# Supplementary material for: Three-component, one-pot sequential synthesis of glyco-hydantoin conjugates
Source: Royal Society of Chemistry journal article supplement (doi:10.1039/c1ob06312j), 2011-01-01

# Supporting Information

## Three-Component, One-Pot Sequential Synthesis of Glyco-Hydantoin Conjugates

Maria Cristina Bellucci, Alessandra Ghilardi, Alessandro Volonterio\*

*Dipartimento di Chimica, Materiali ed Ingegneria Chimica “G. Natta” del Politecnico di Milano, via Mancinelli 7, I-20131 Milano, Italy, Dipartimento di Scienze Molecolari Agroalimentari, Università degli Studi di Milano, via Celoria 2, 20133 Milano, Italy.*

**alessandro.volonterio@polimi.it**

### Table of Contents:

Pages 2-35       $^1\text{H}$  NMR and  $^{13}\text{C}$  NMR spectra of all new compounds

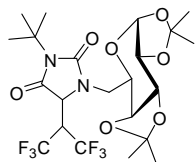

**4a**, major diast.

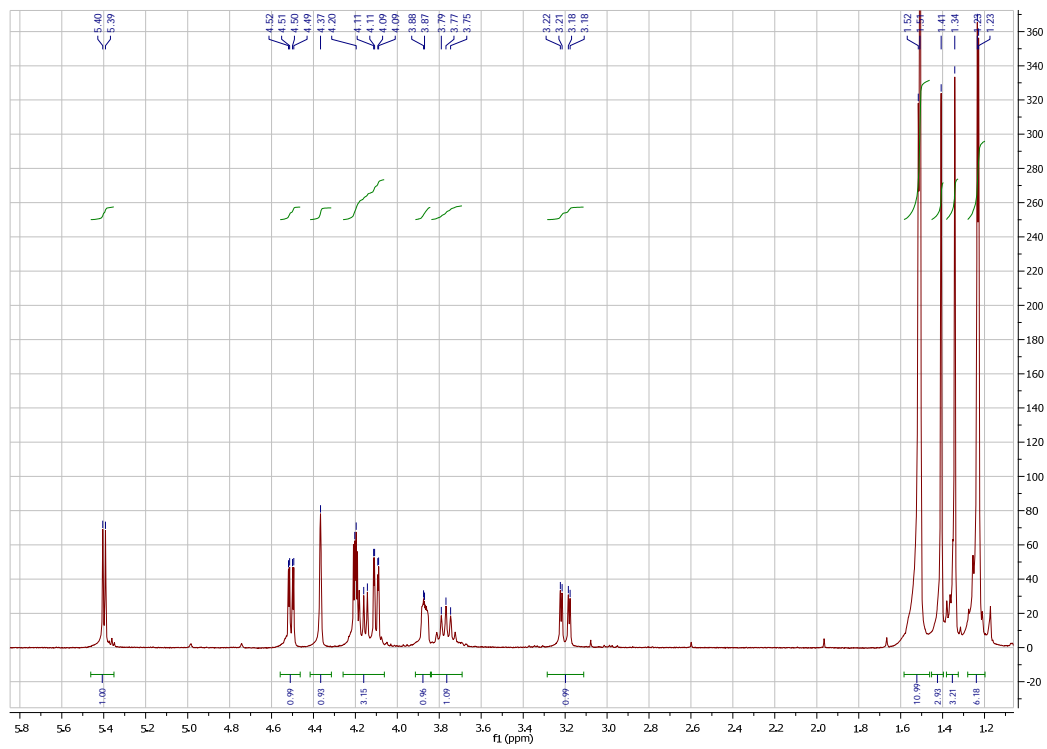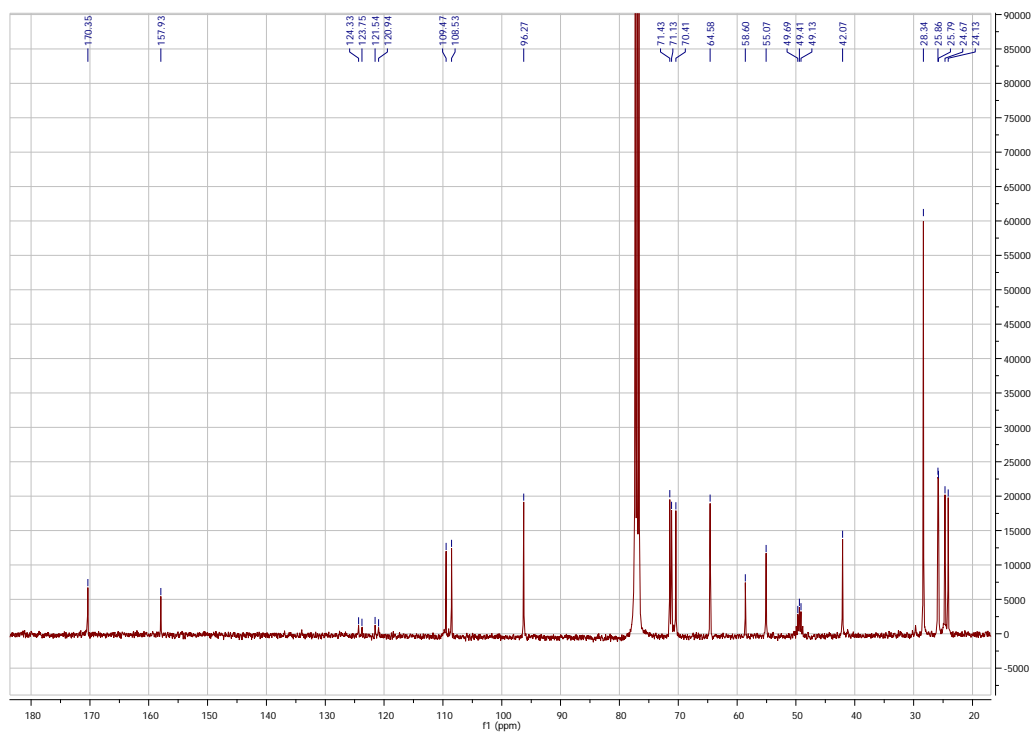

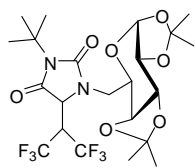

**4a**, minor diast.

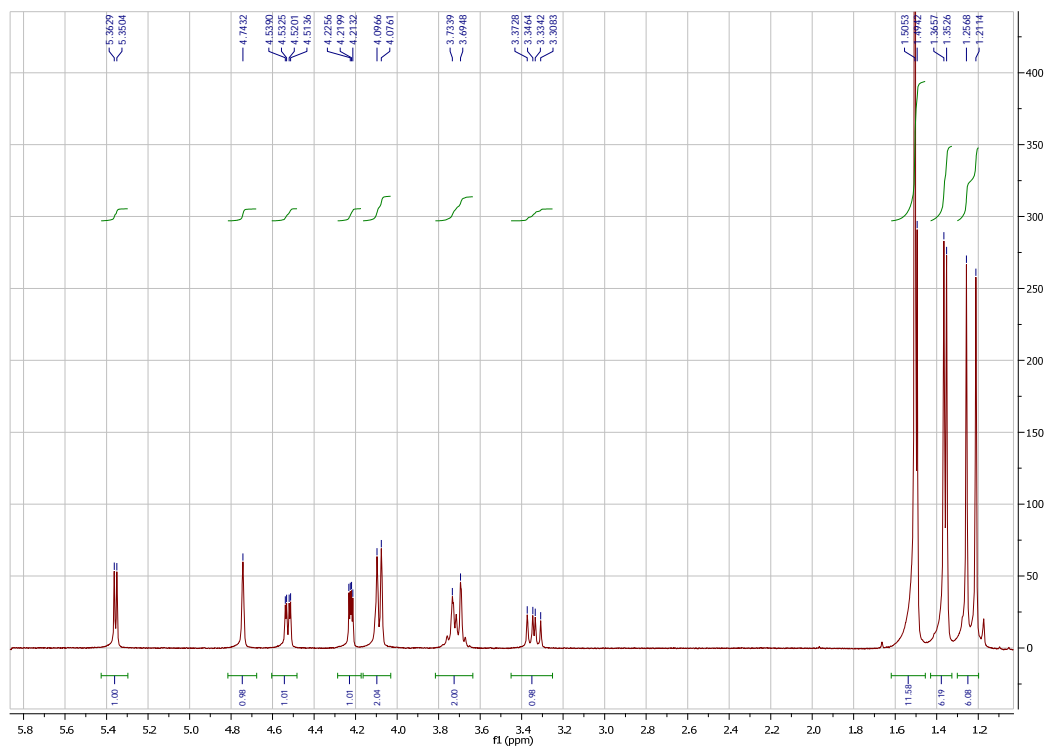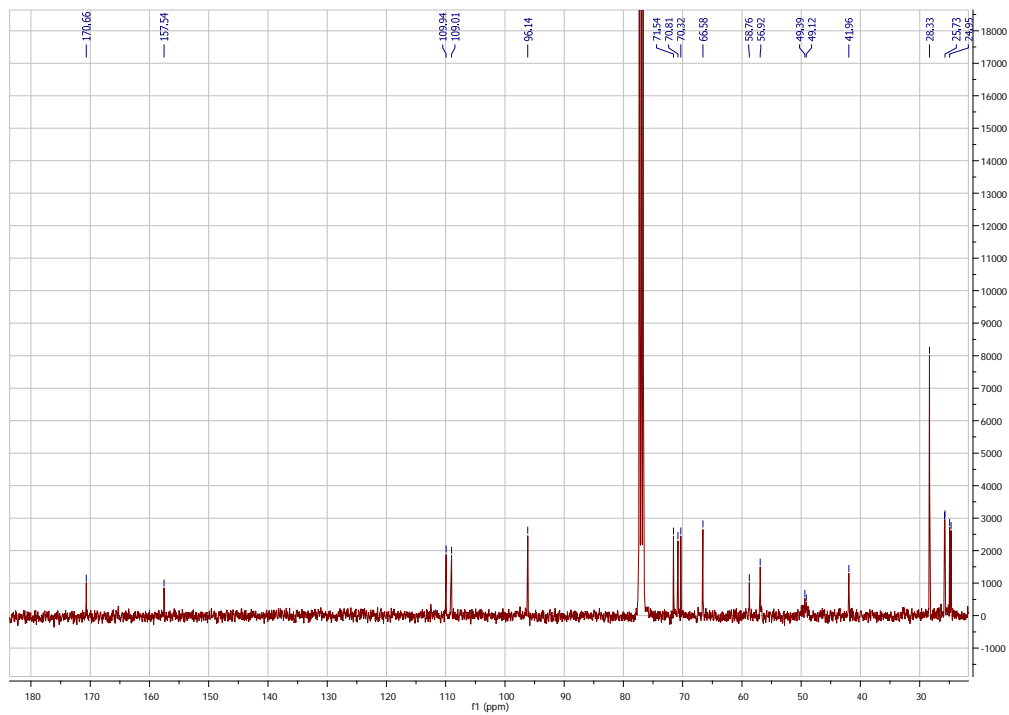

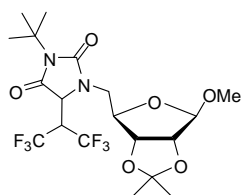

**4b**, major diast.

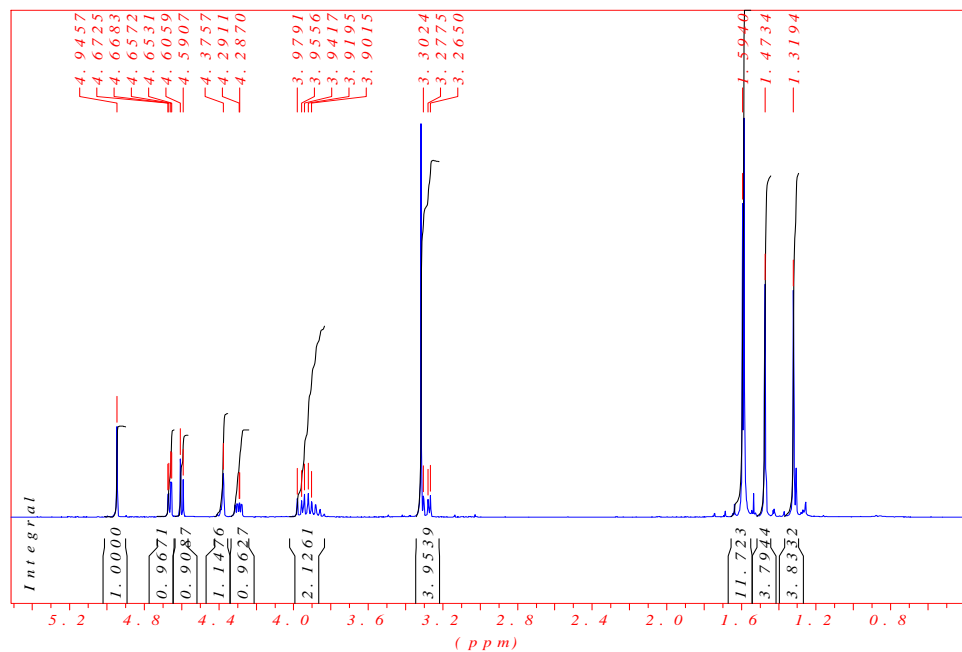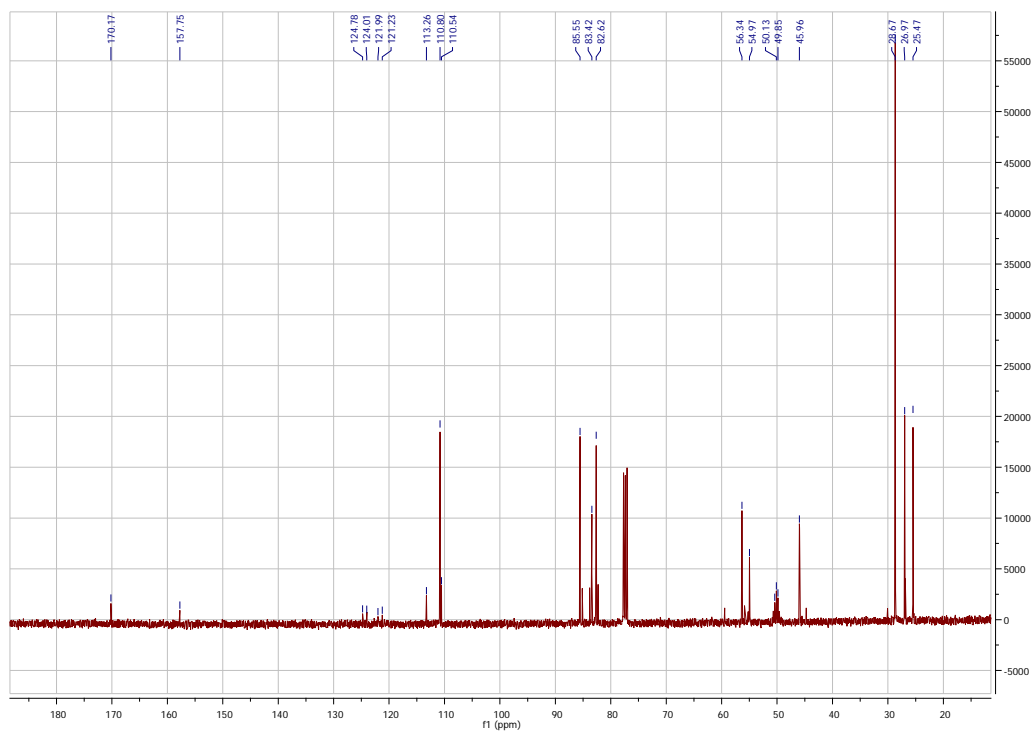

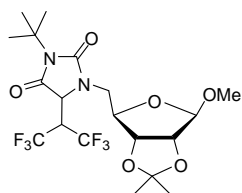

**4b**, minor diast.

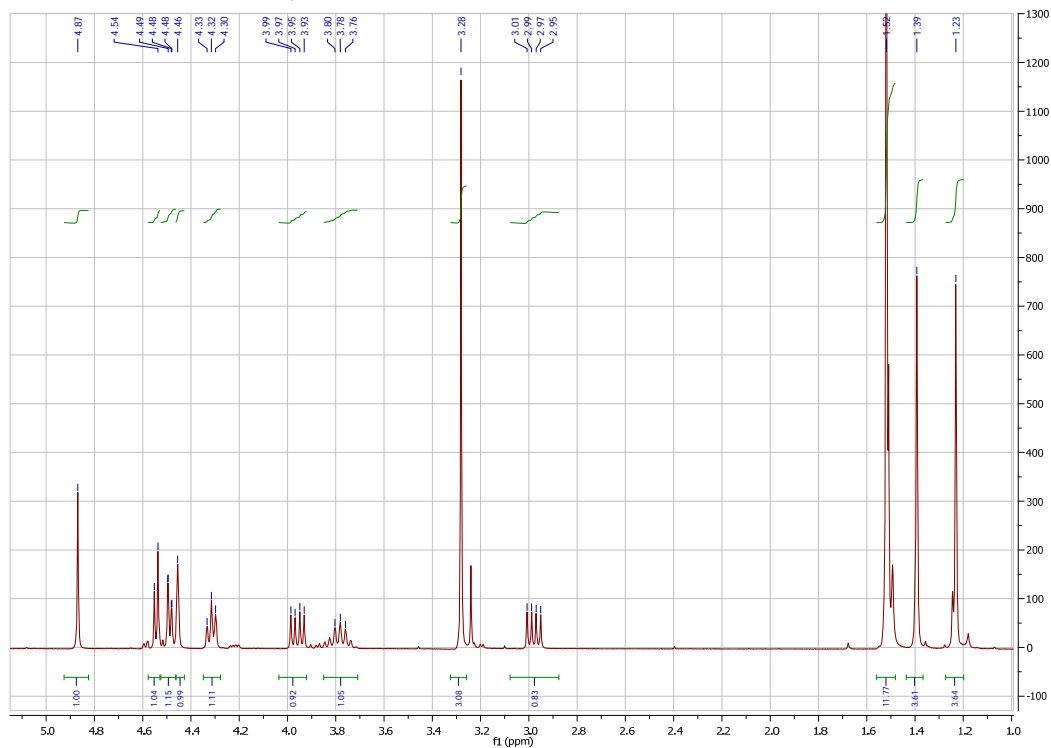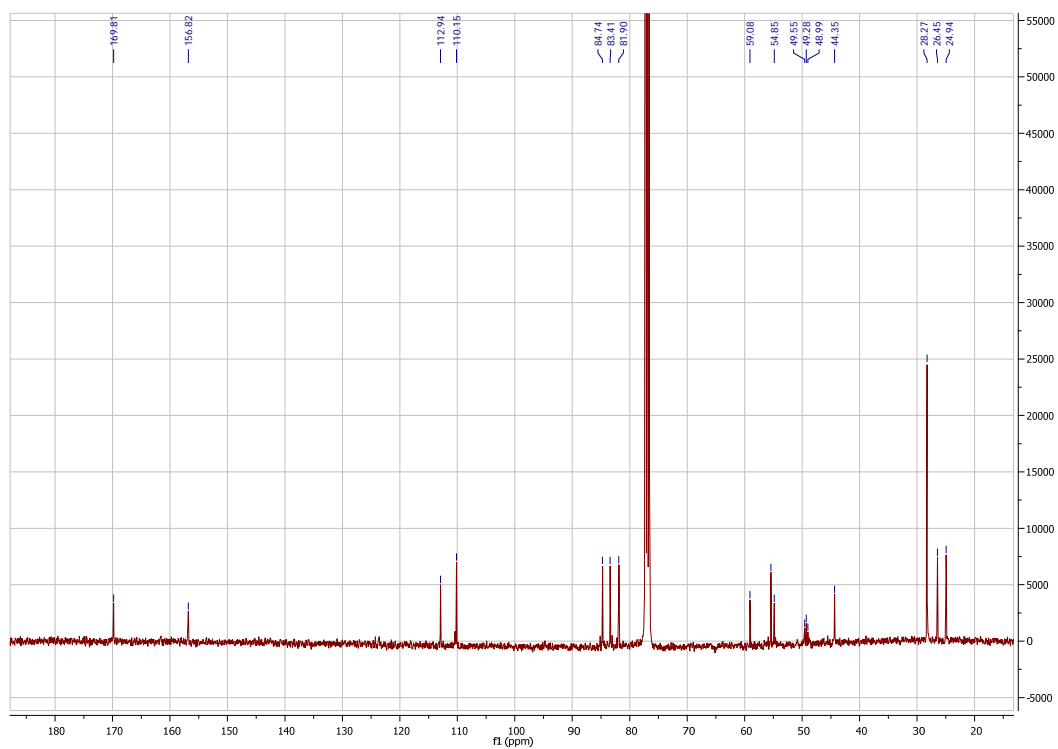



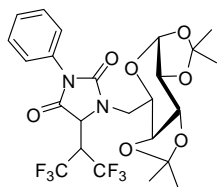

**4c**, minor diast.

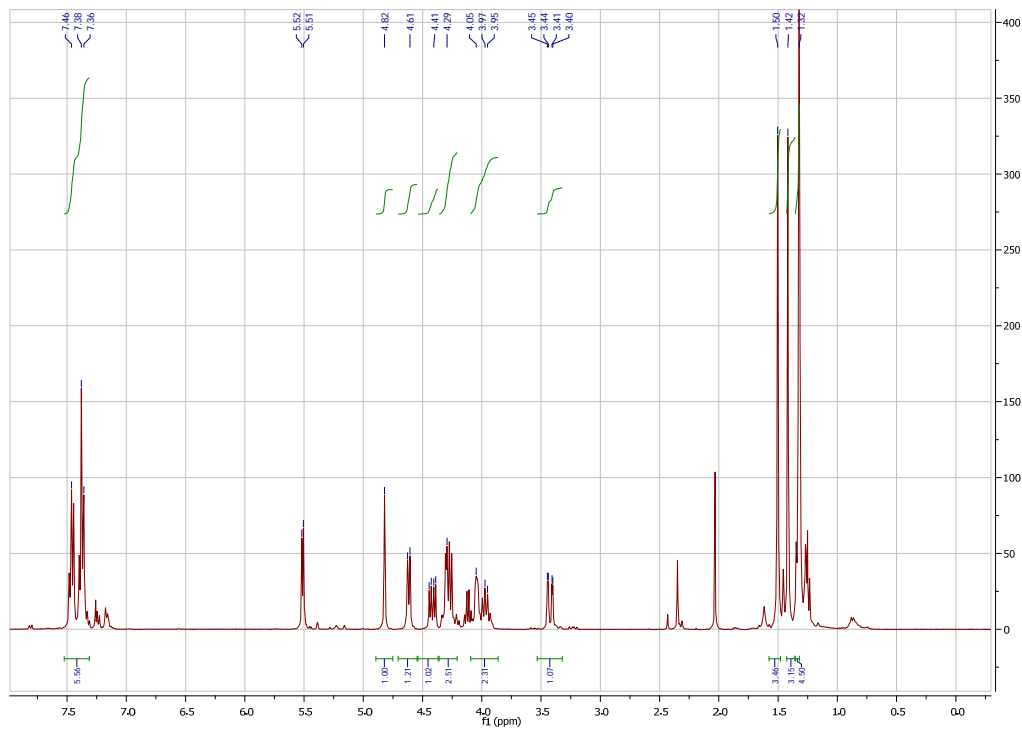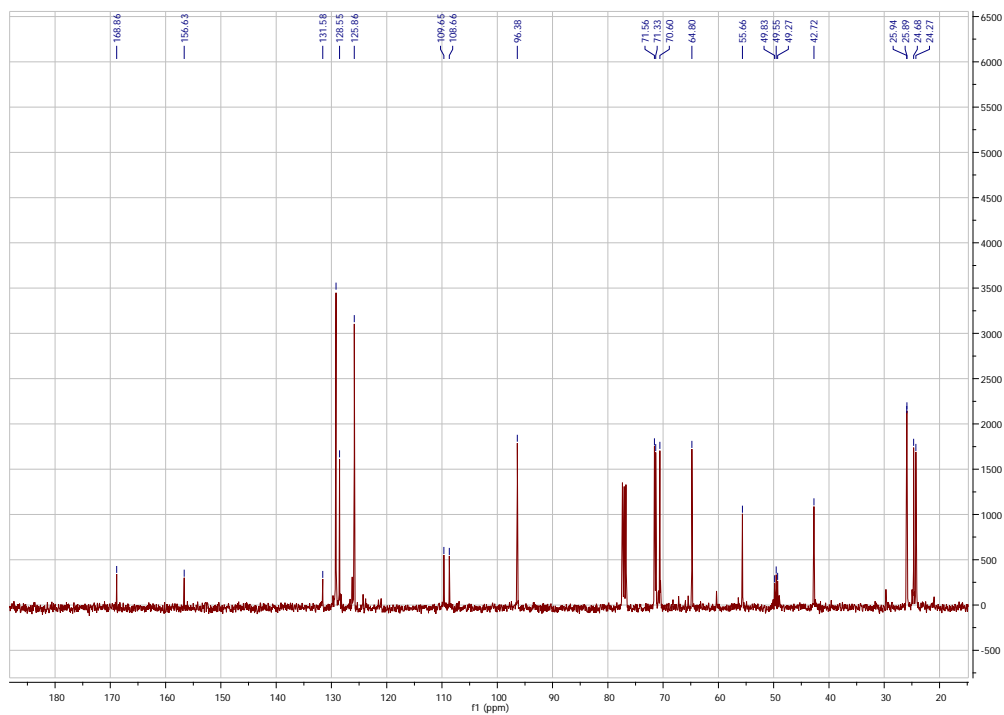

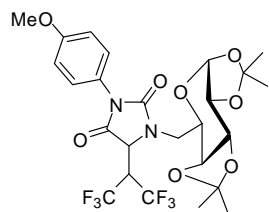

**4d**, mixture of two diastereoisomers

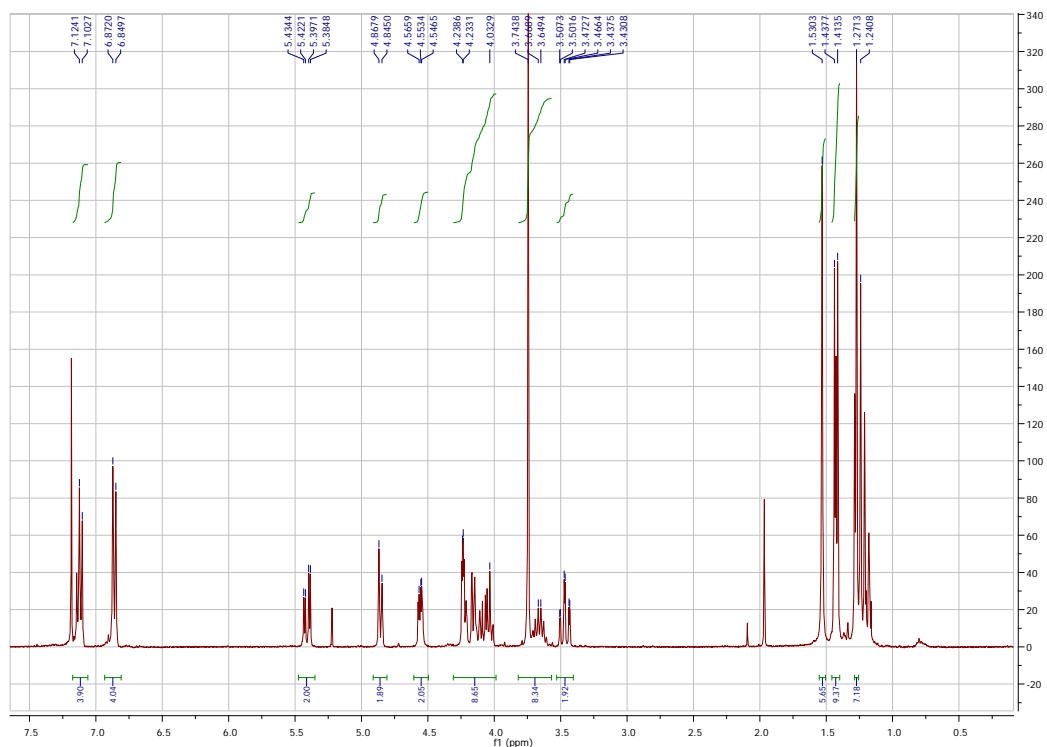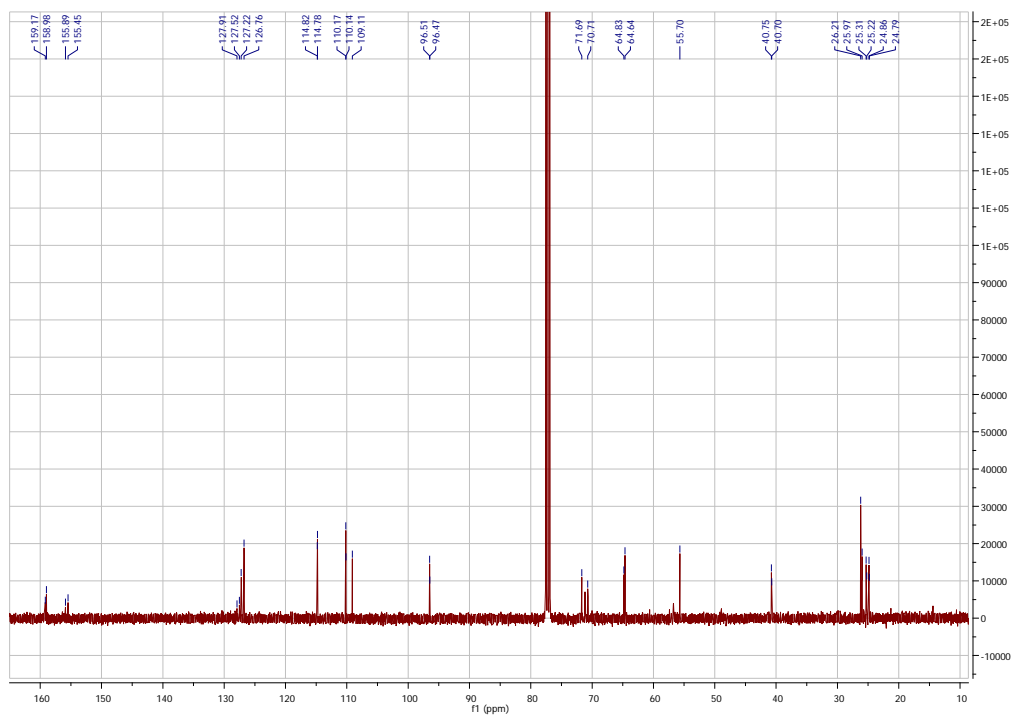



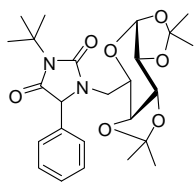

**4f**, mixture of two diastereoisomers

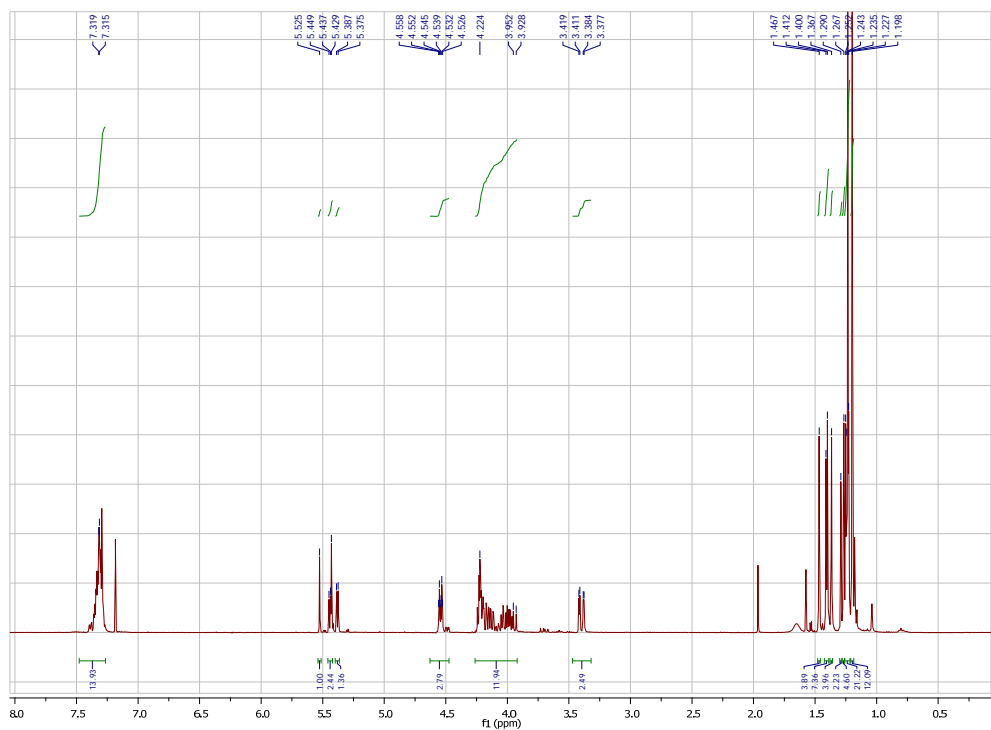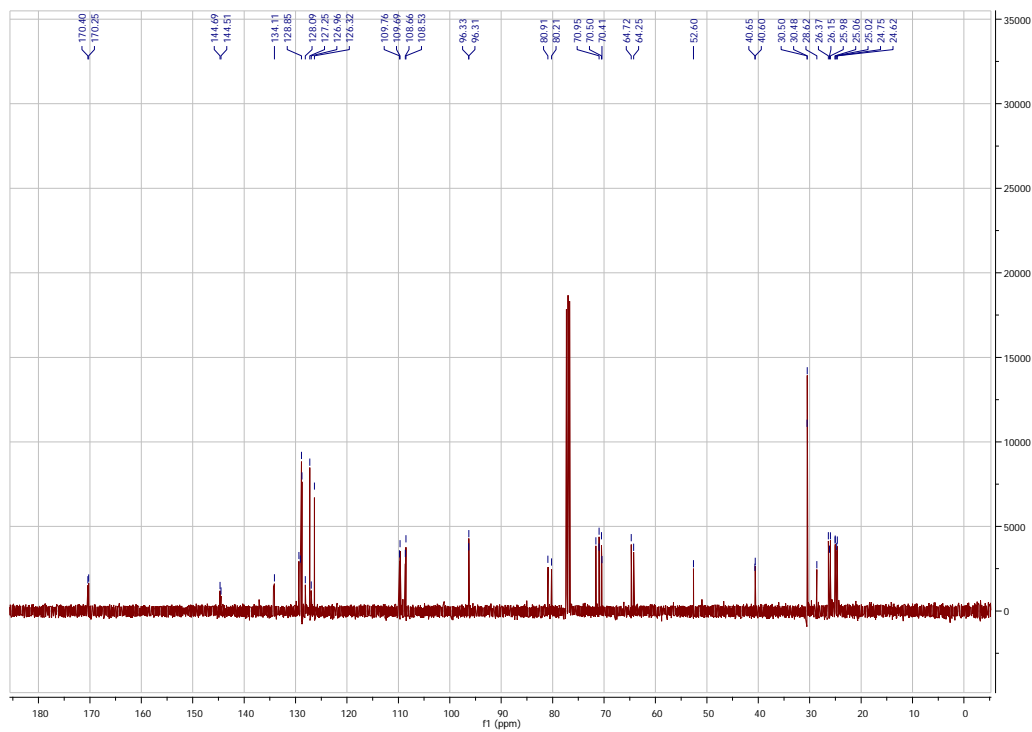

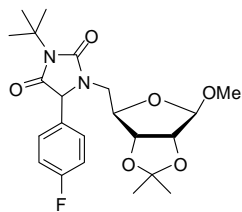

**4g**, mixture of two diastereoisomers

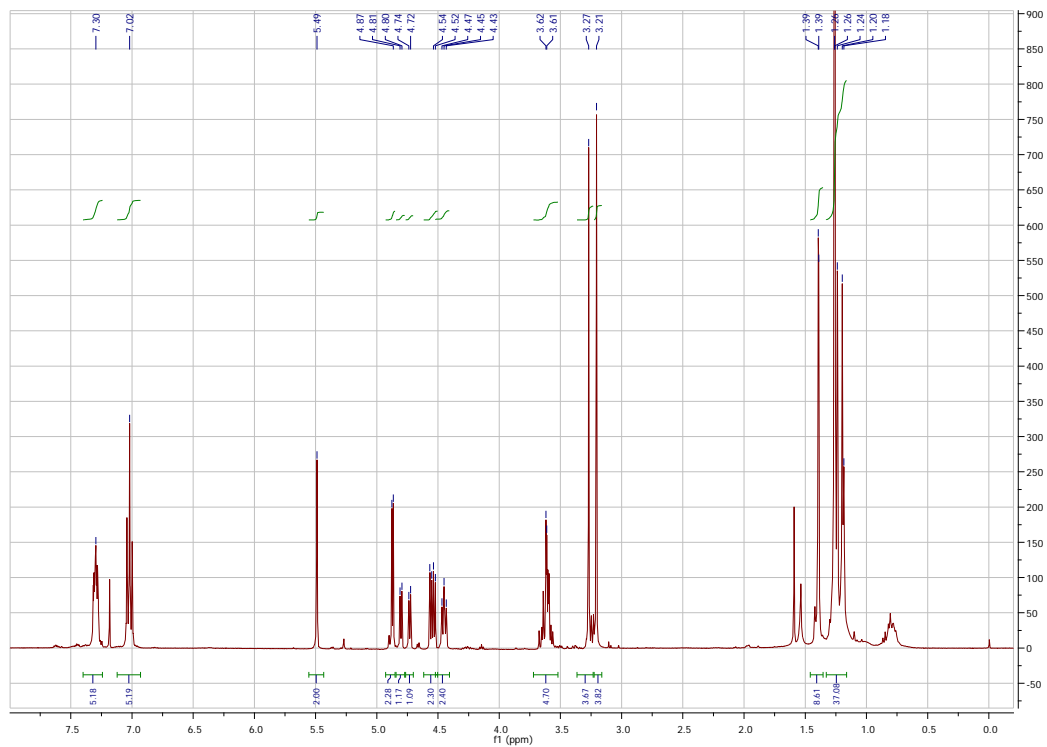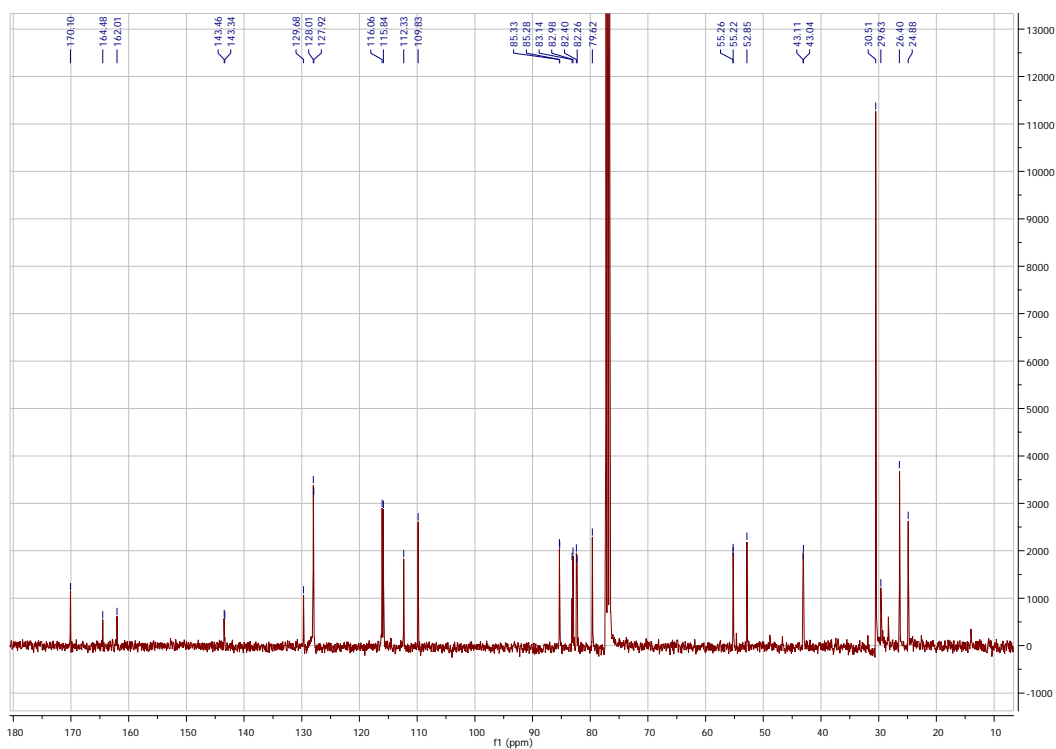

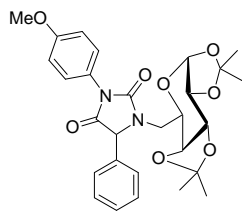

**4h**, one diast.

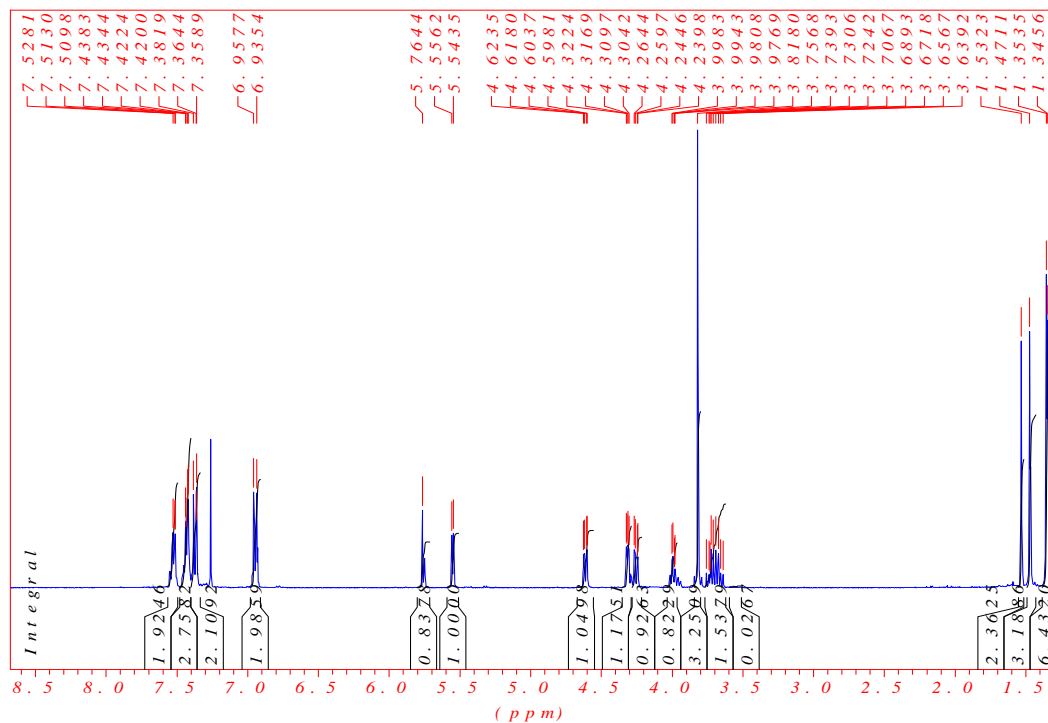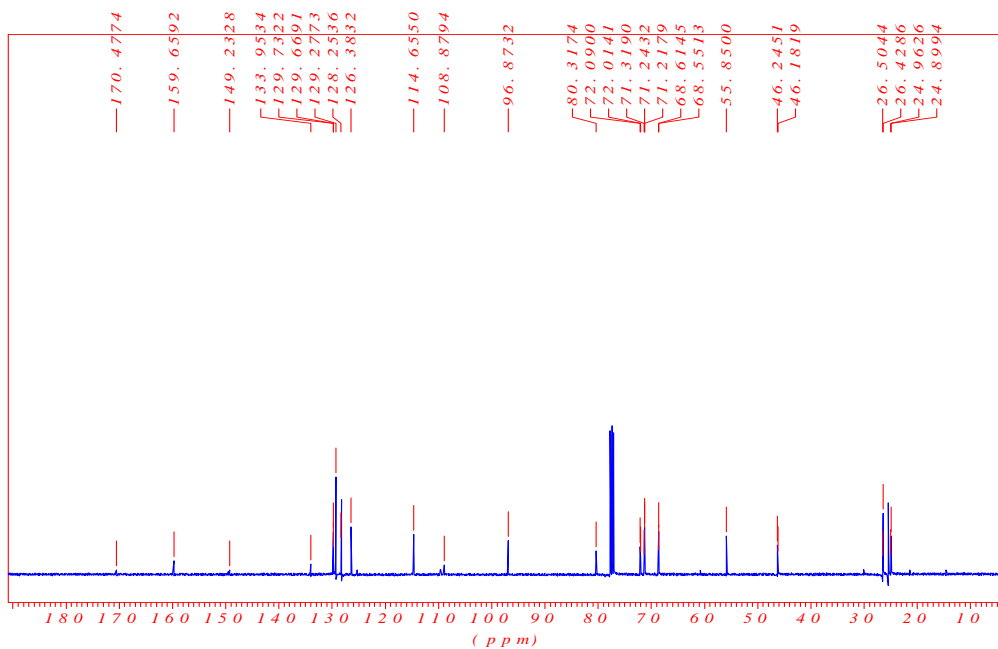



**4h**, other diast.

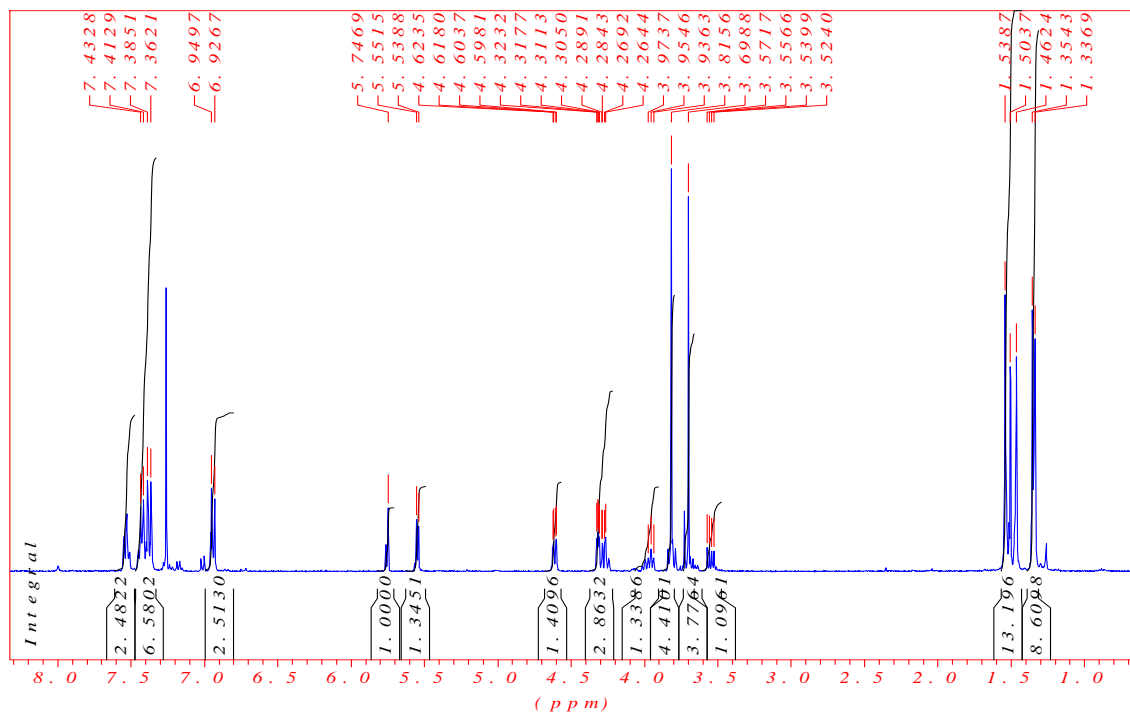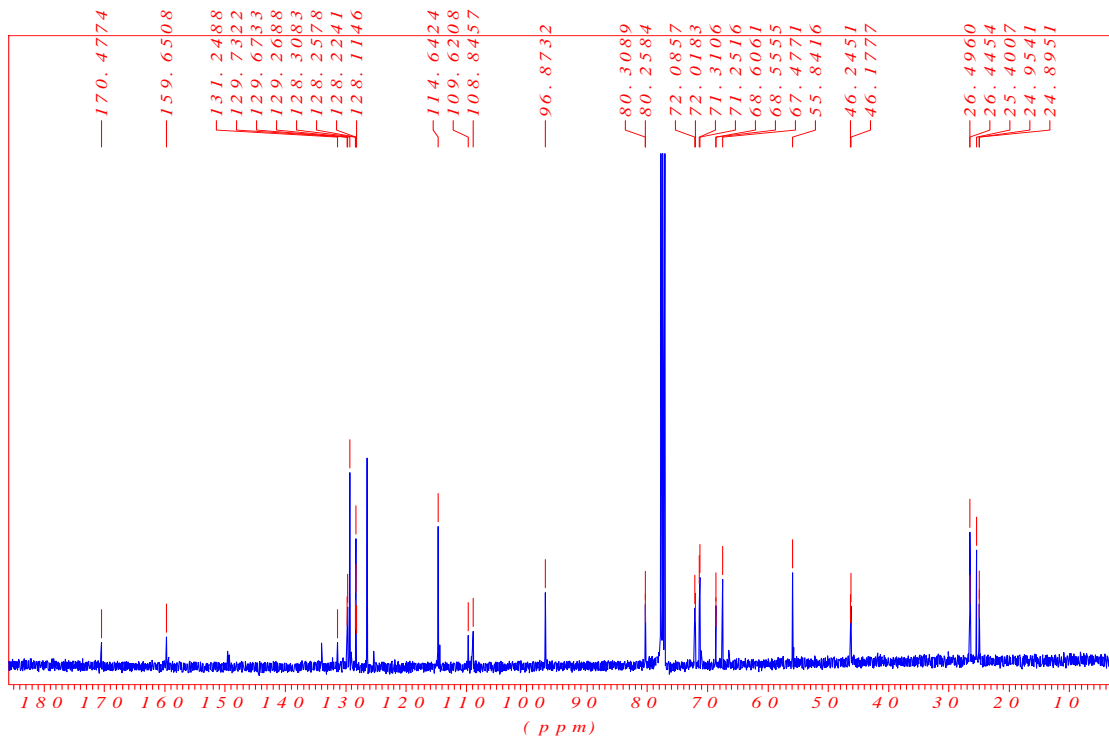

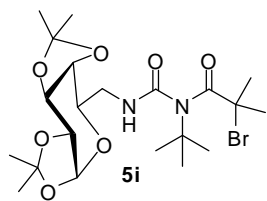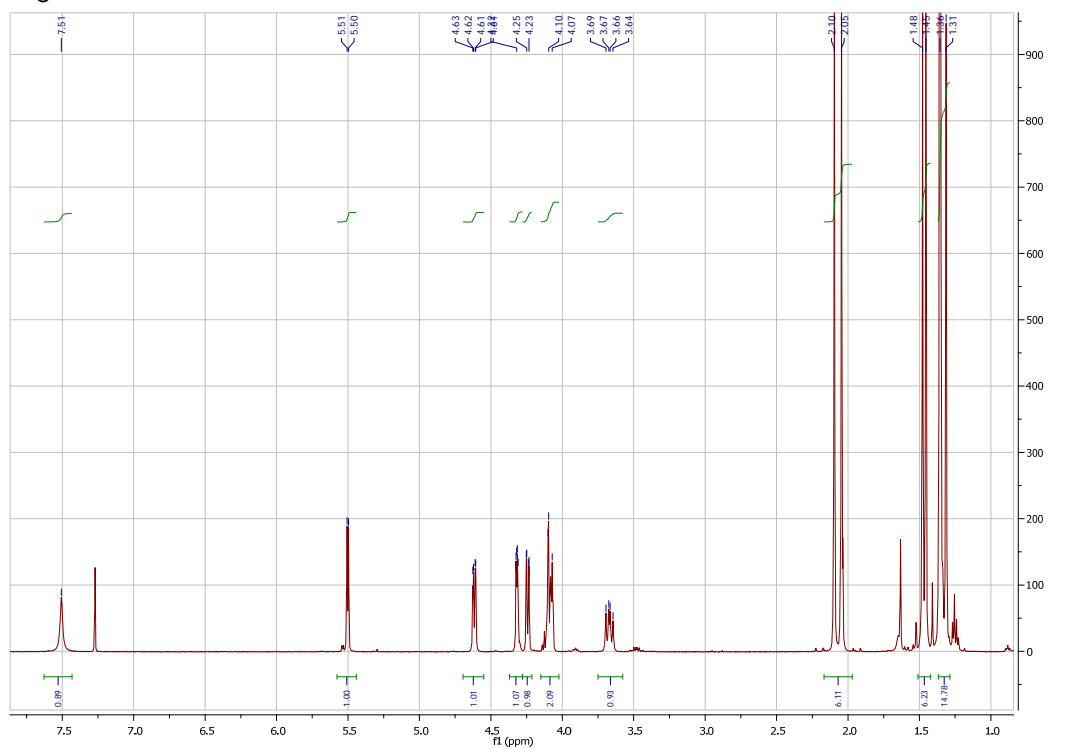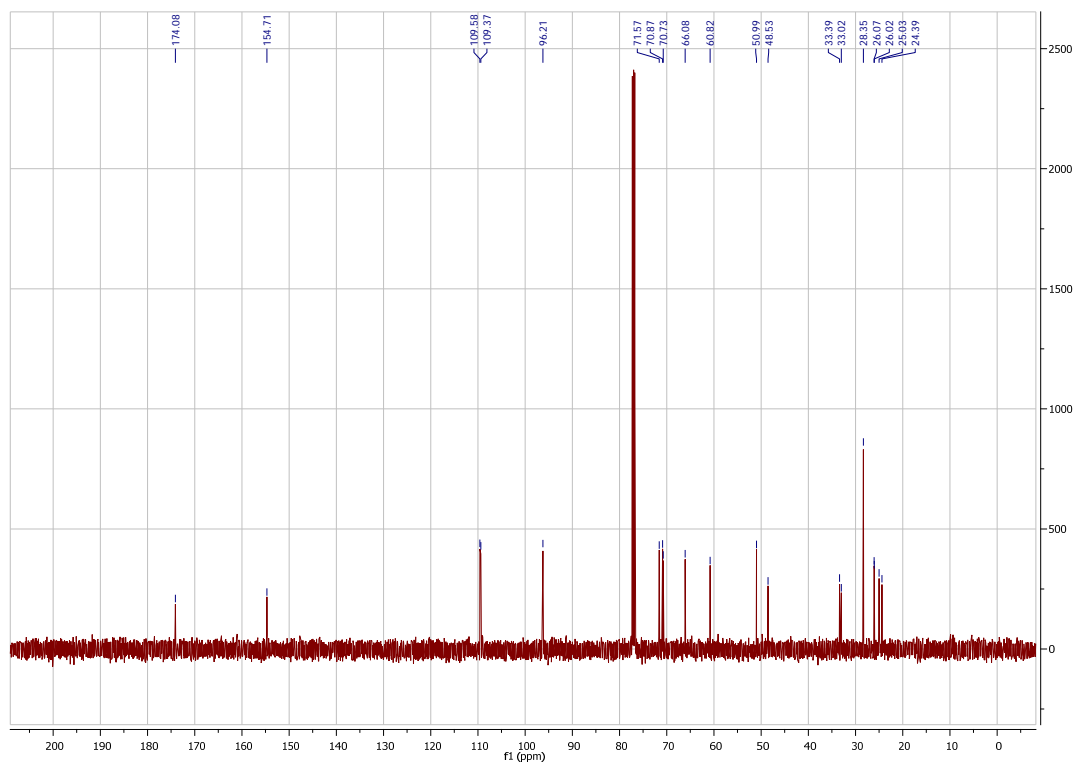

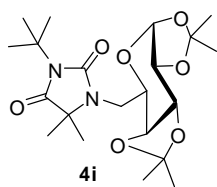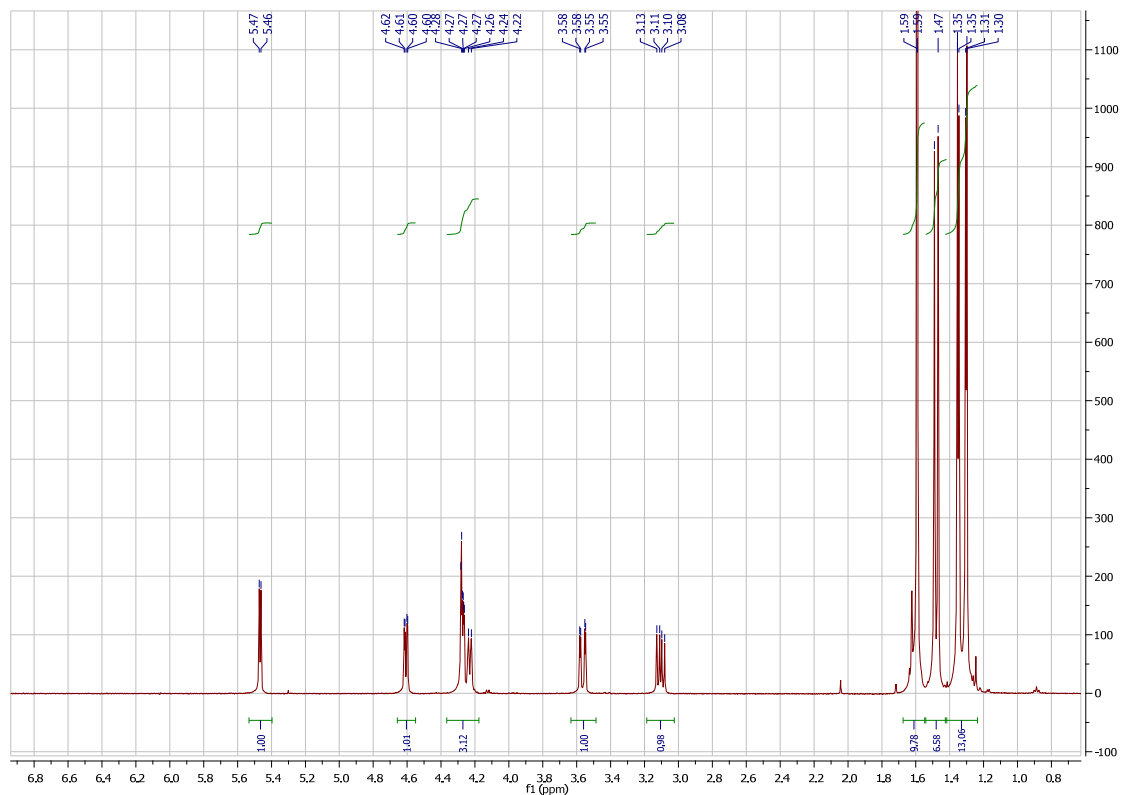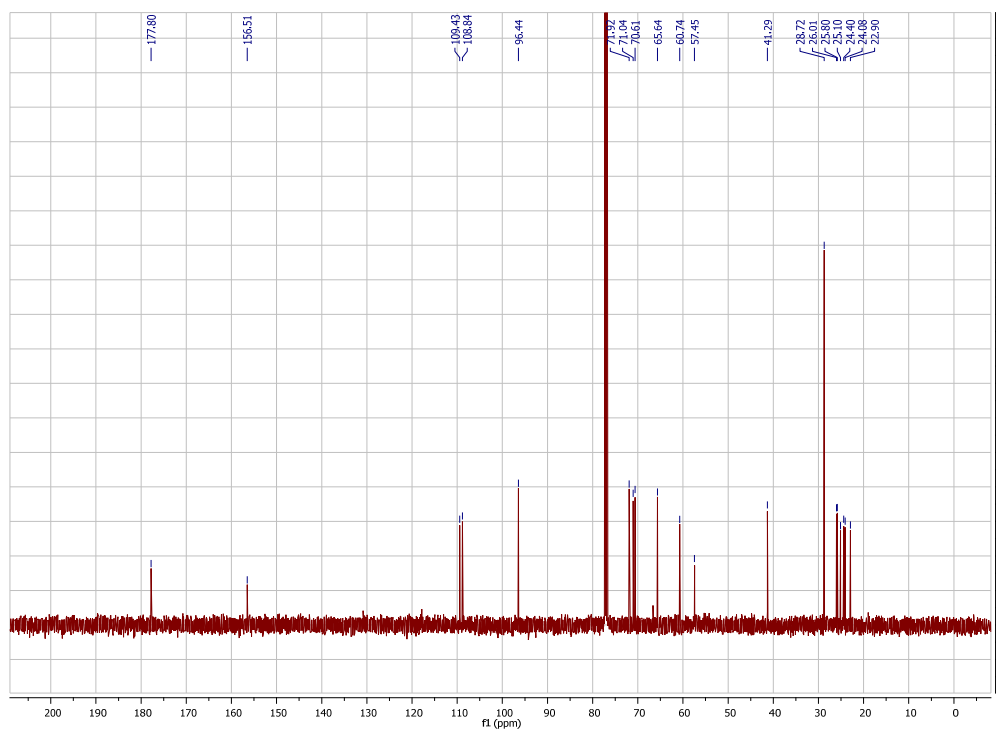

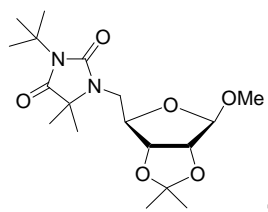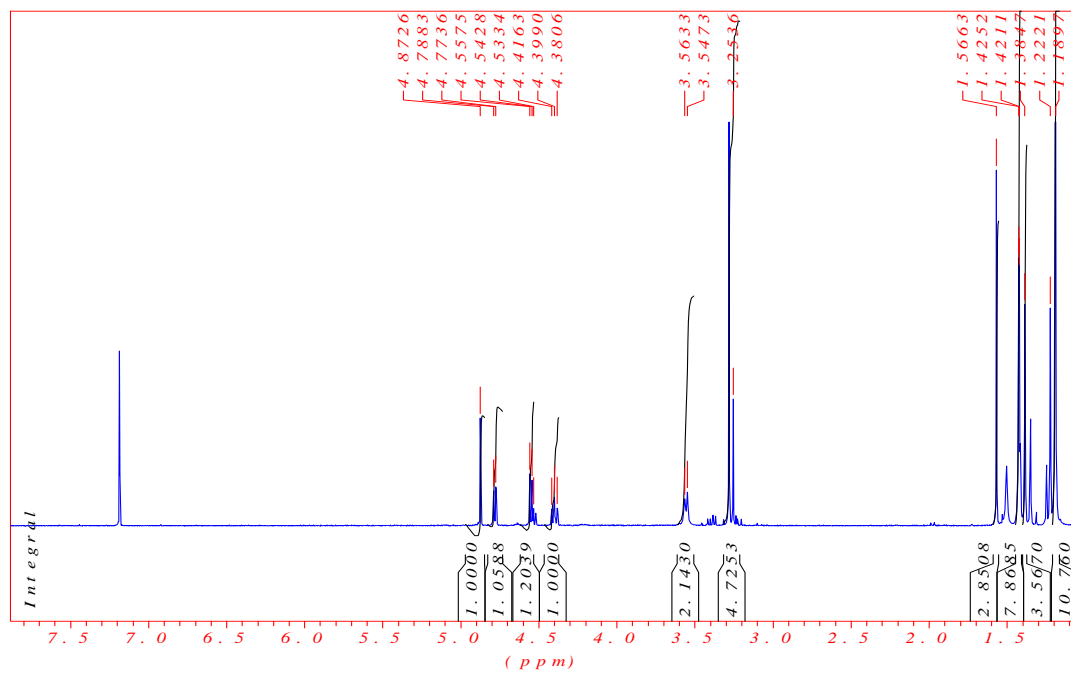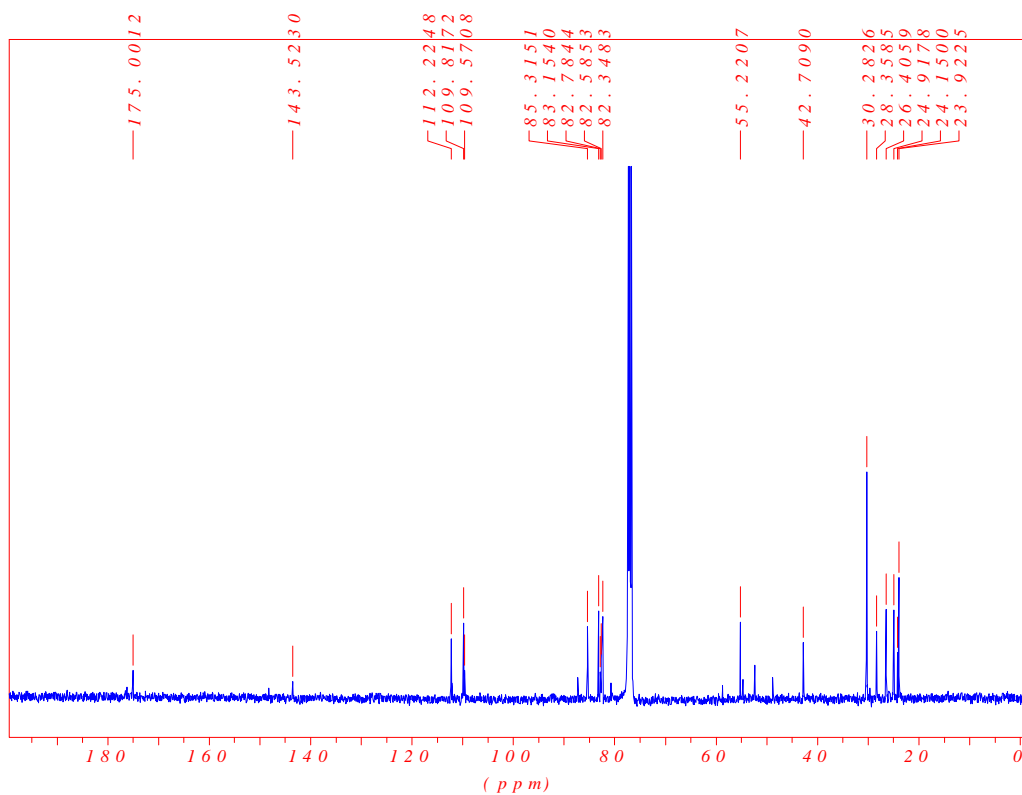

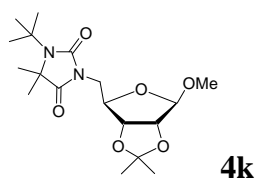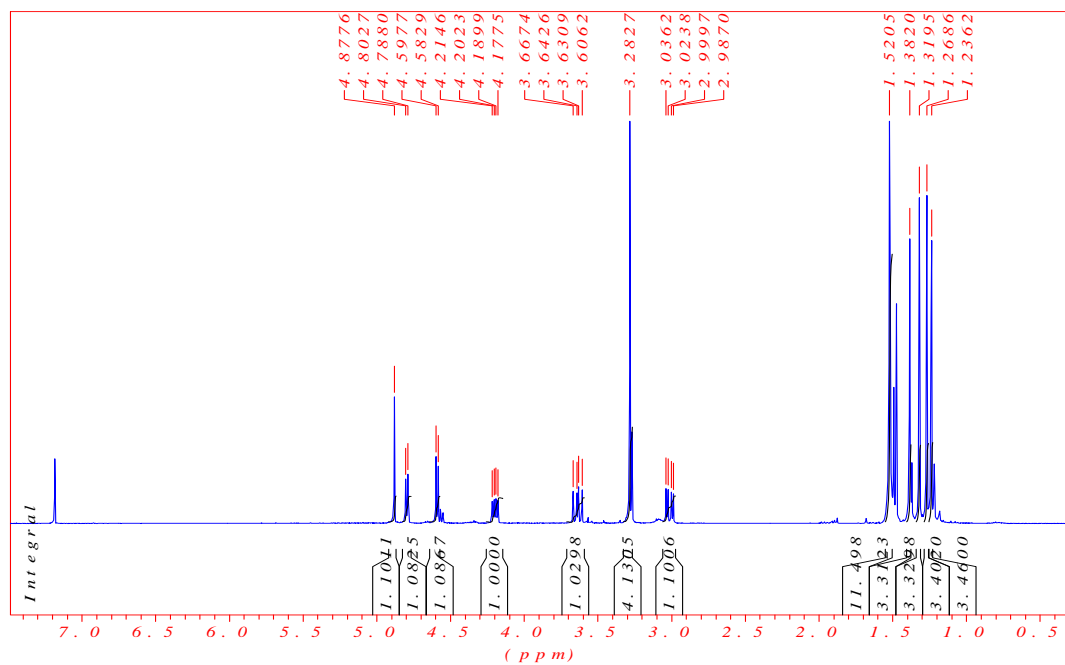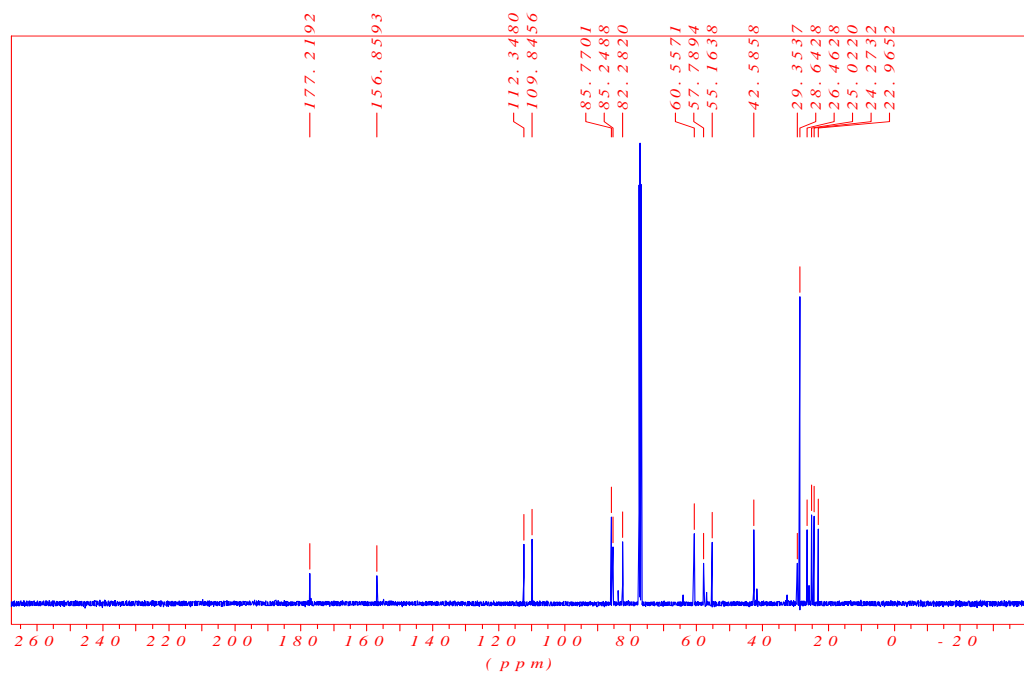



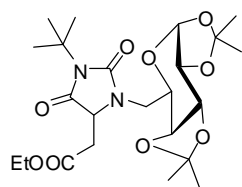

**4I**, mixture of two diastereoisomers

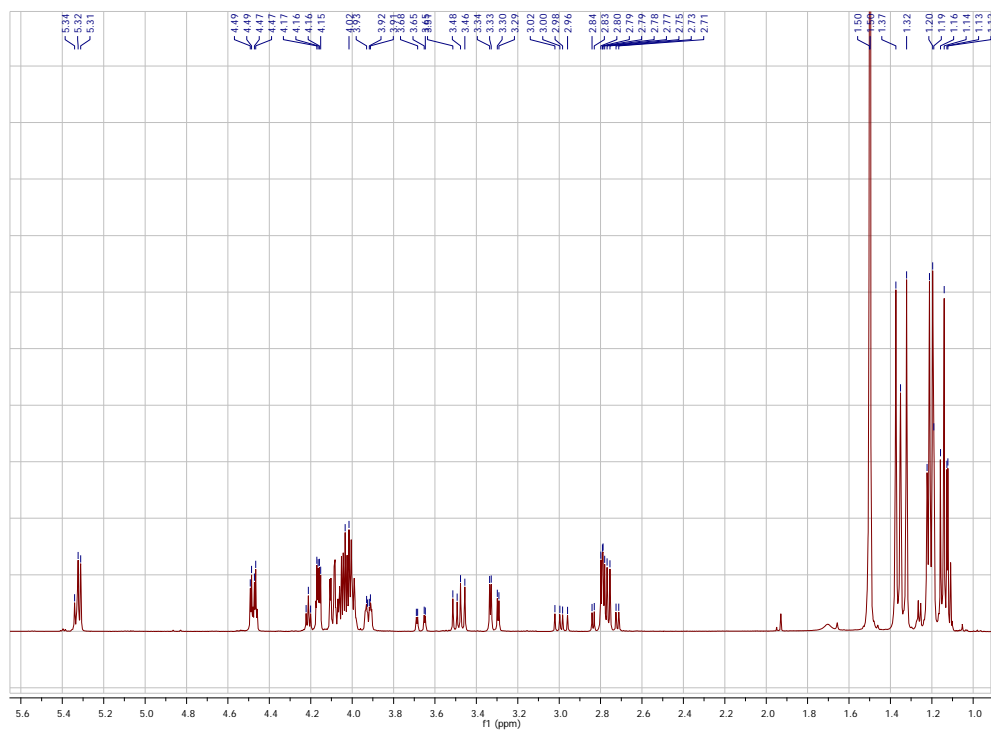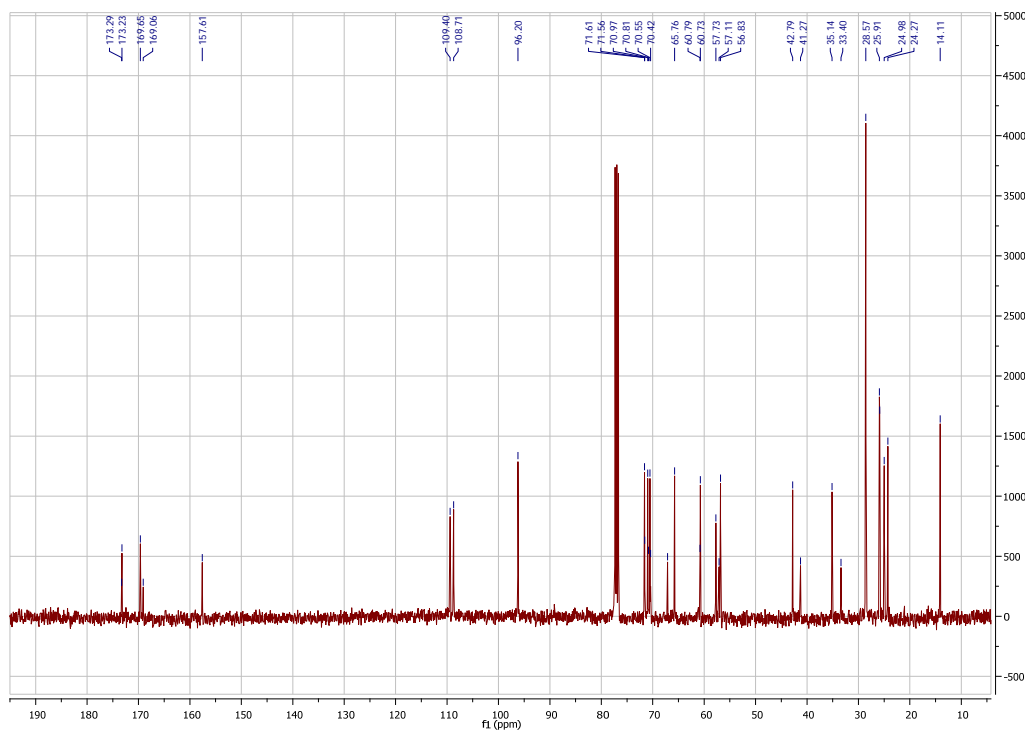

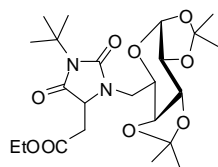

**4m**, mixture of two diastereoisomers

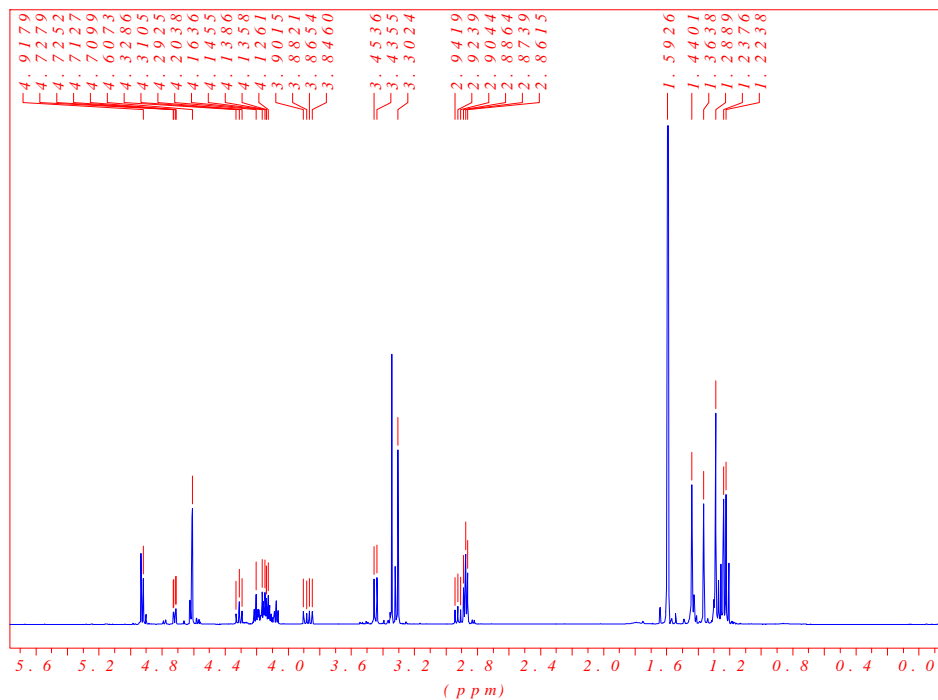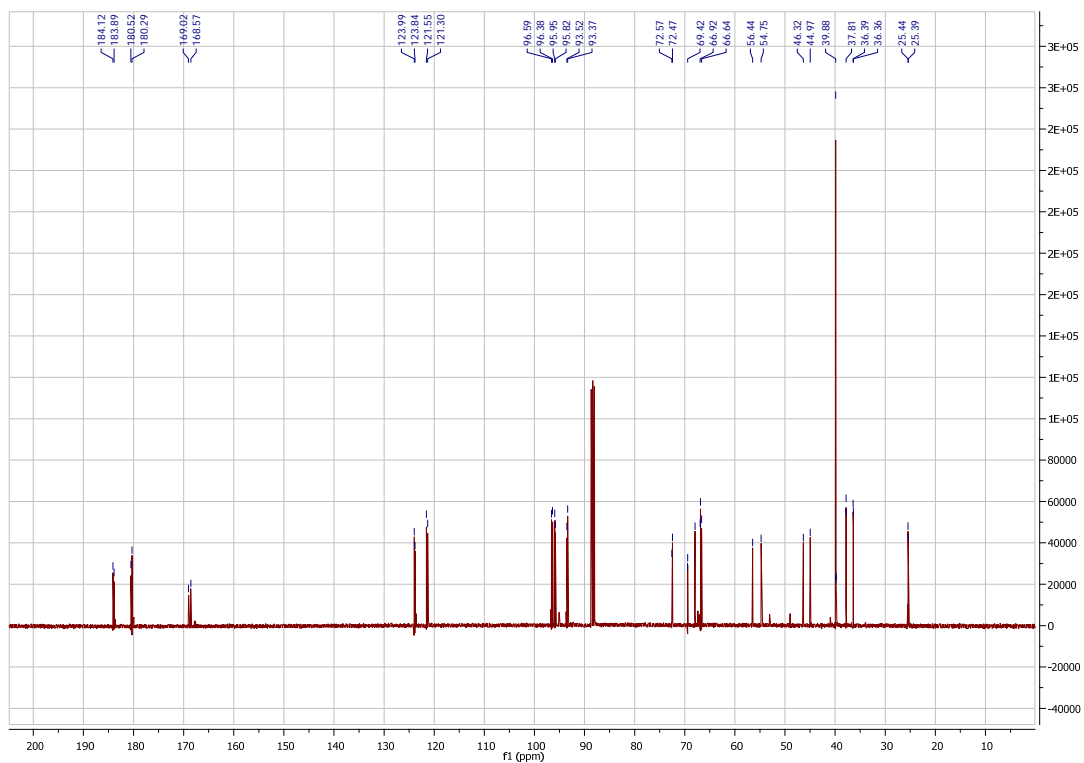

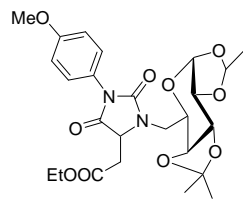

**4n**, mixture of two diastereoisomers

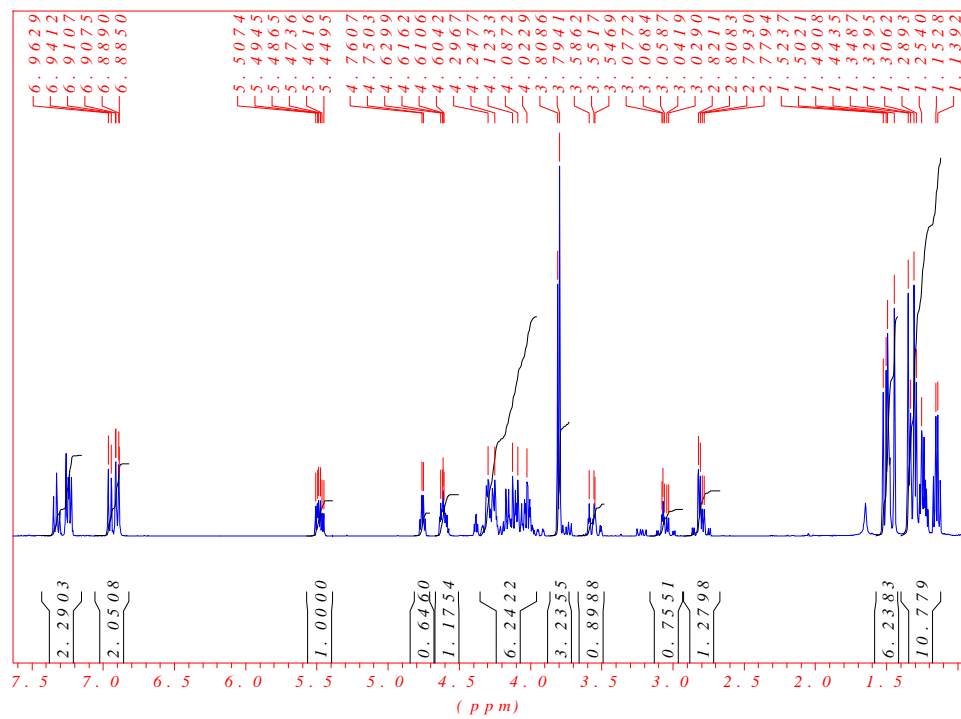

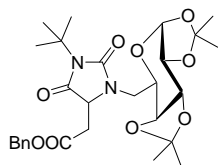

**40**, mixture of two diastereoisomers

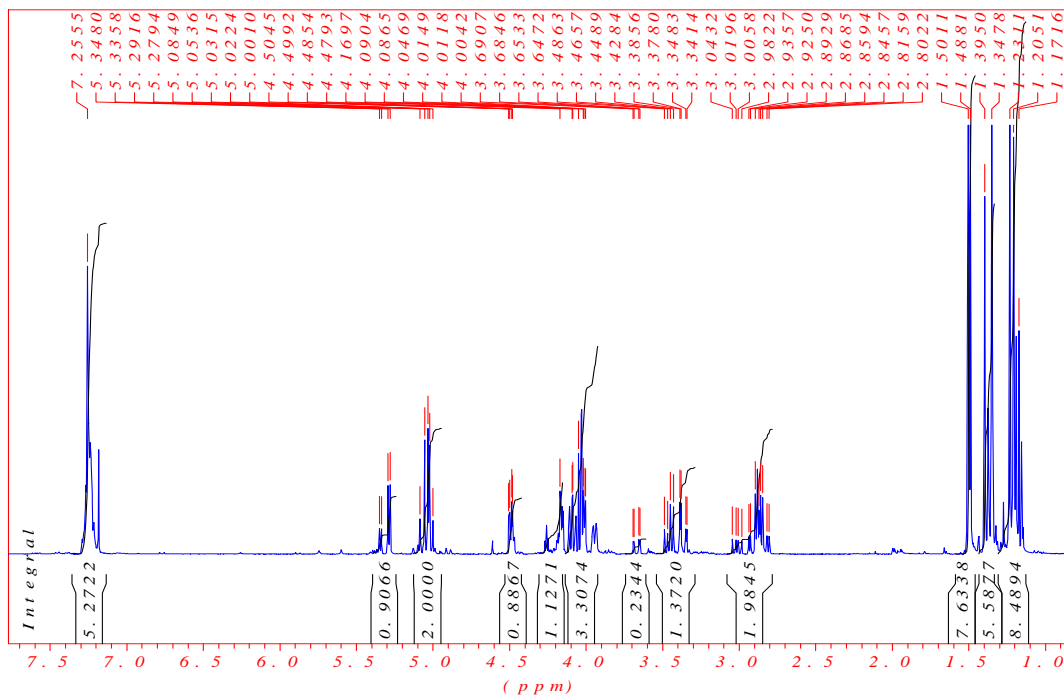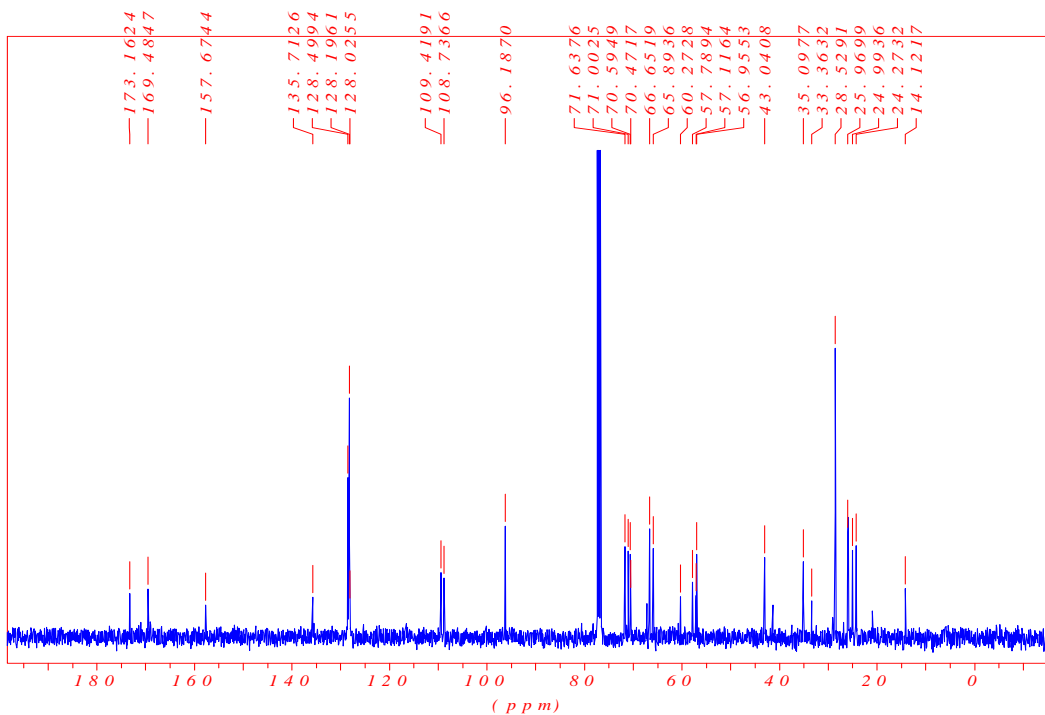

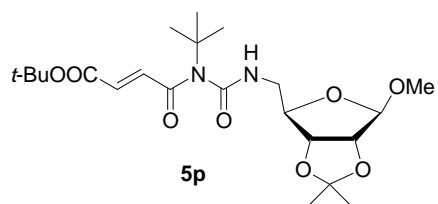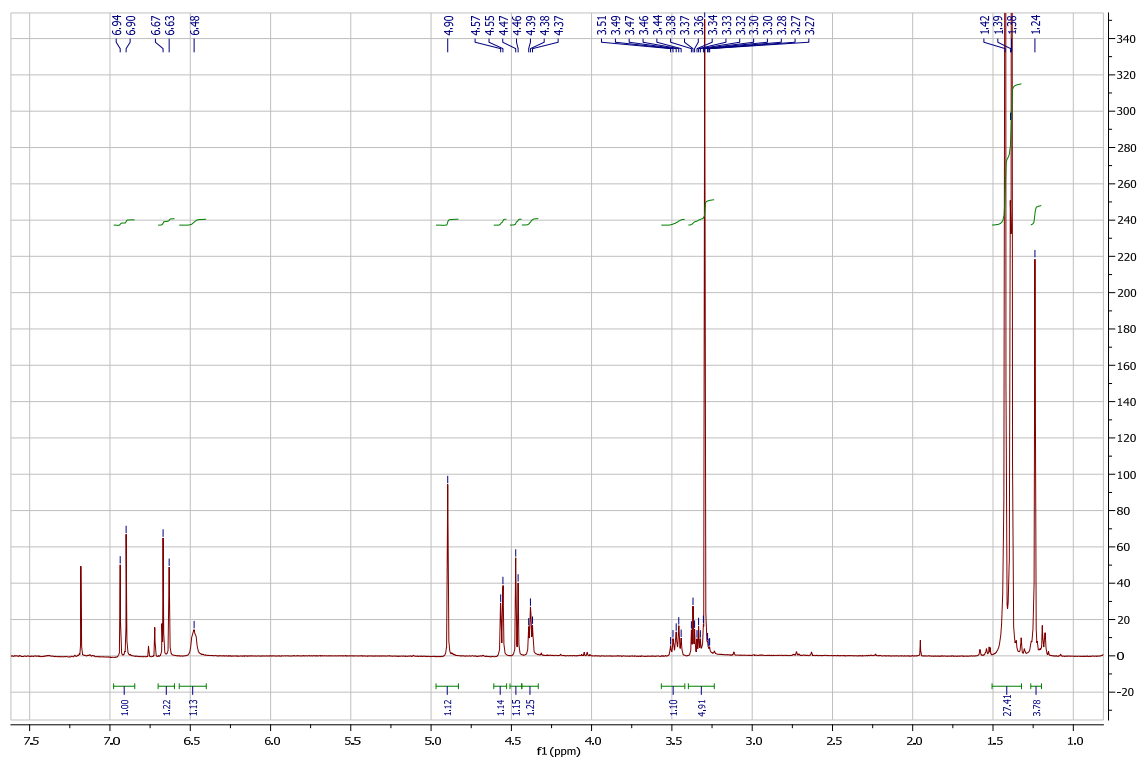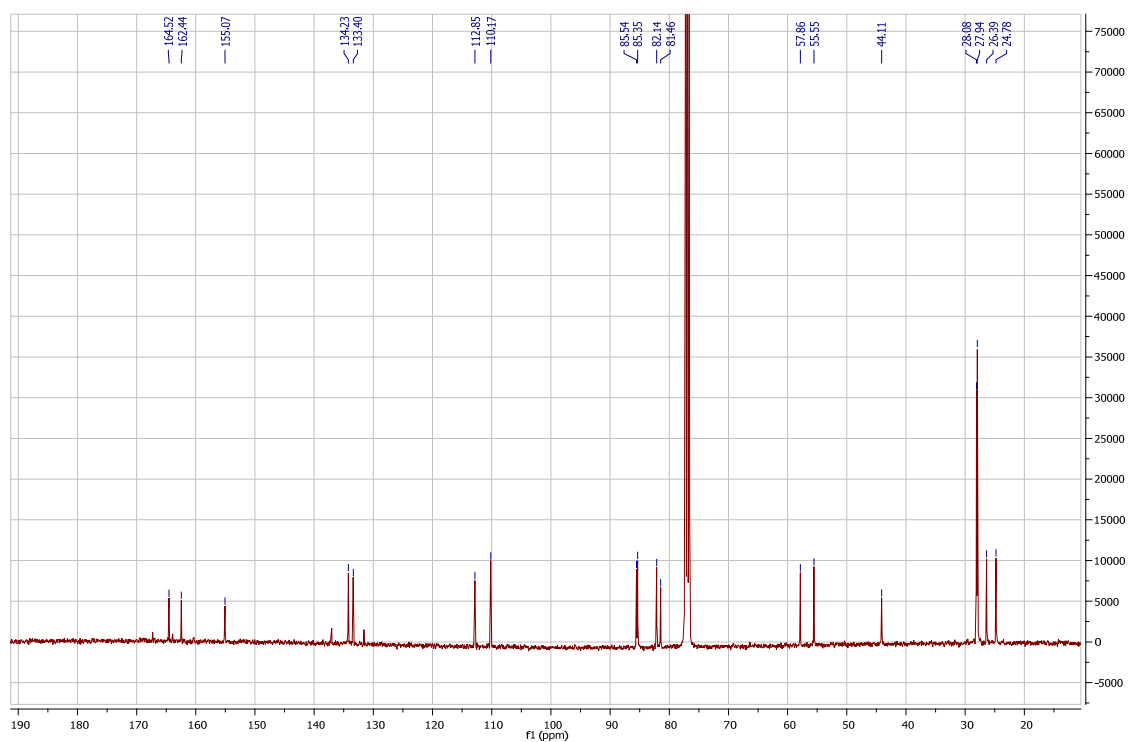

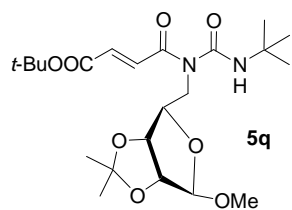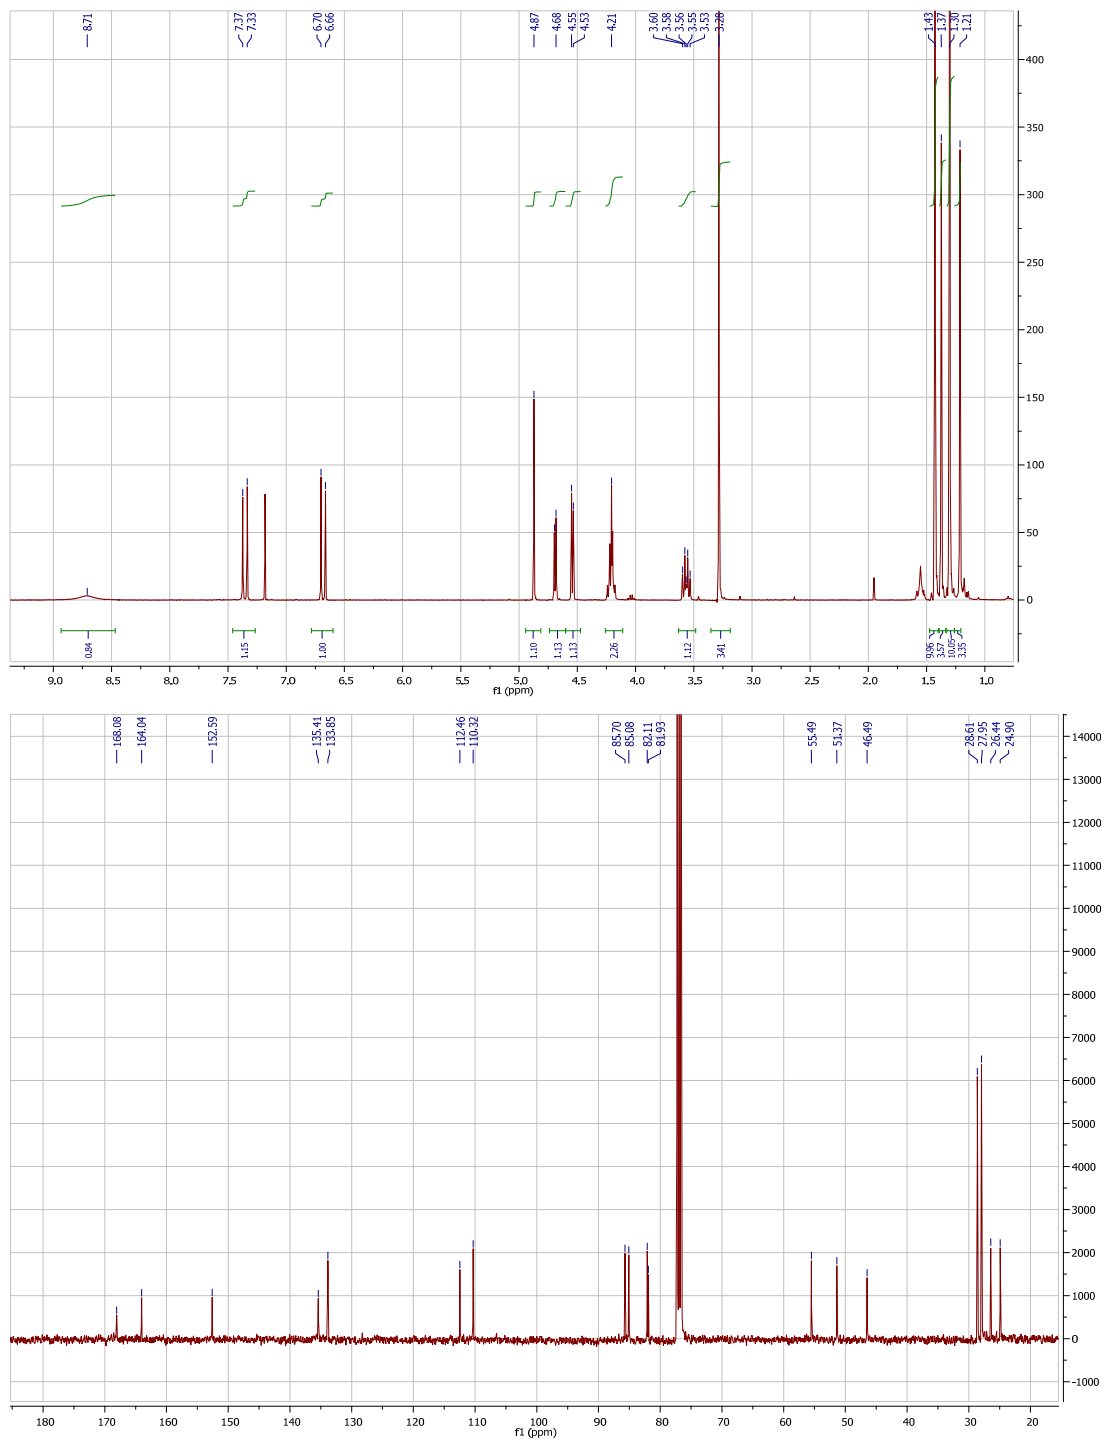

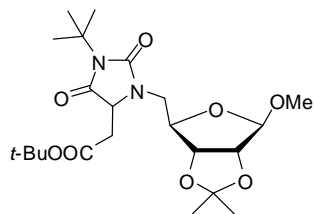

**4p**, mixture of two diastereoisomers

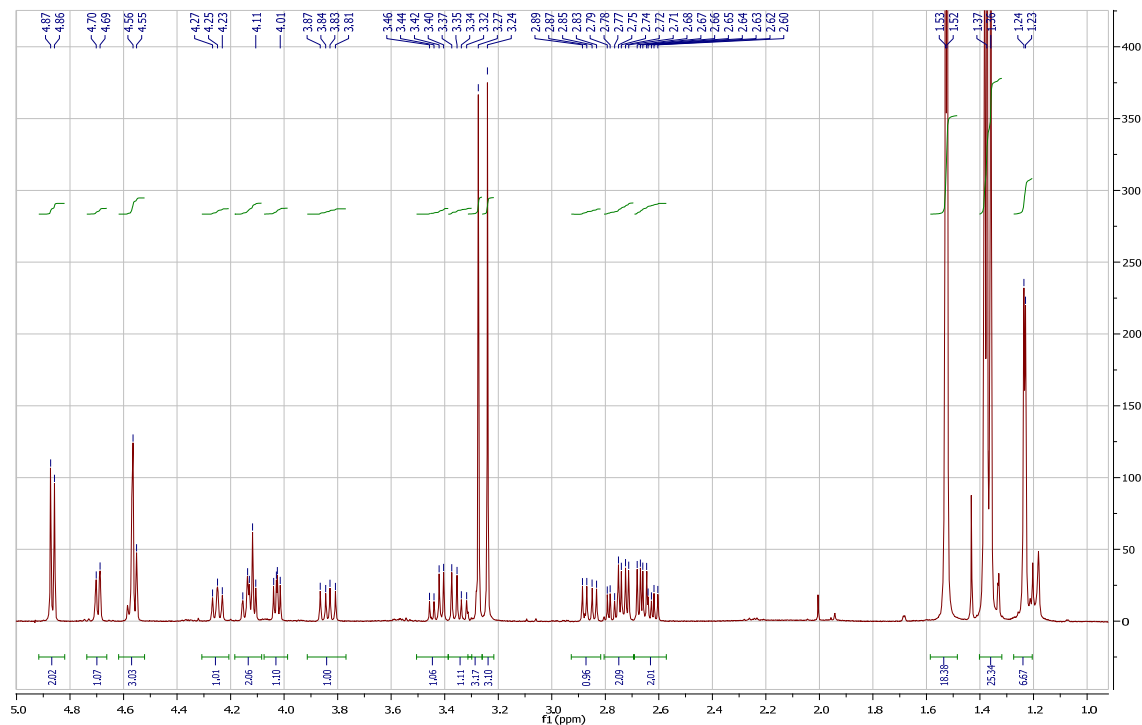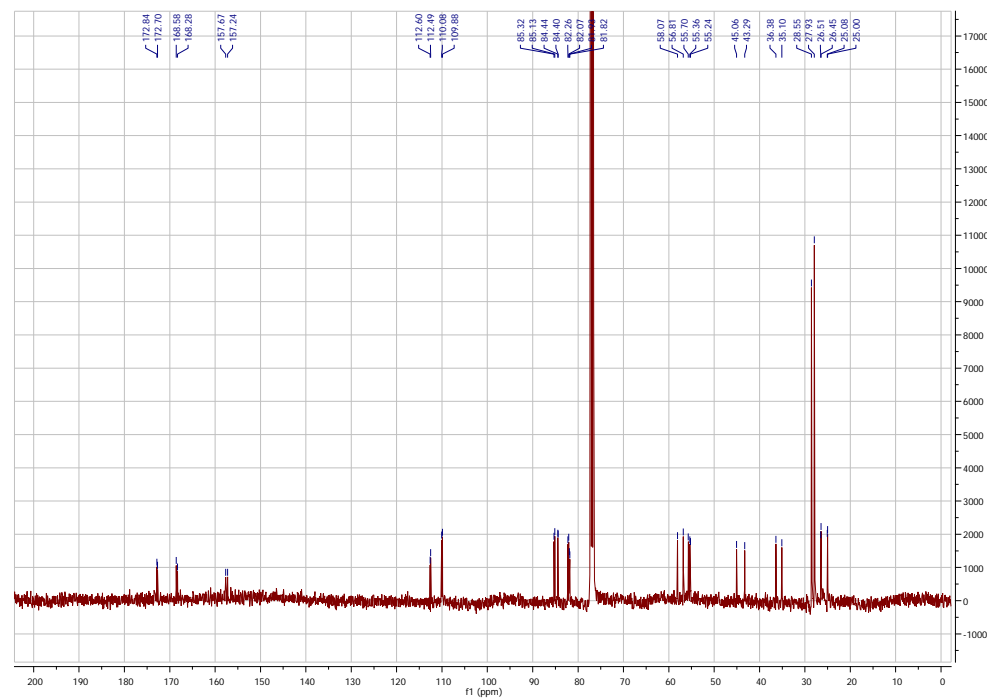

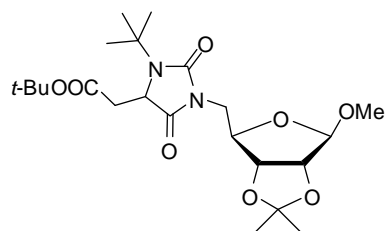

**4q**, mixture of two diastereoisomers

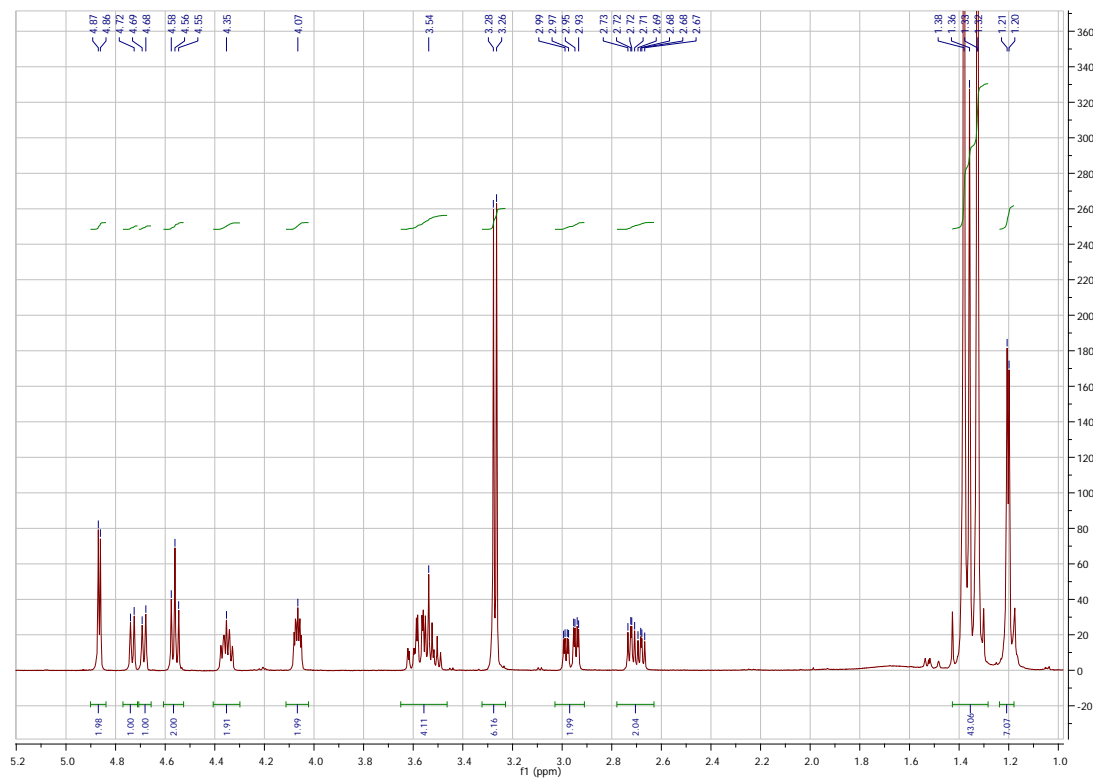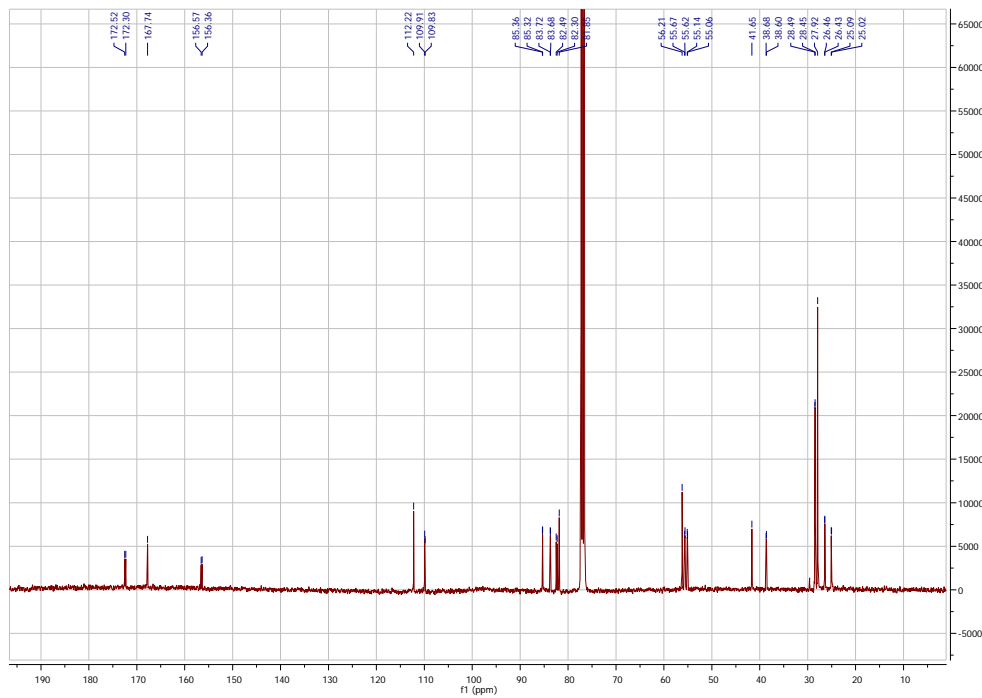





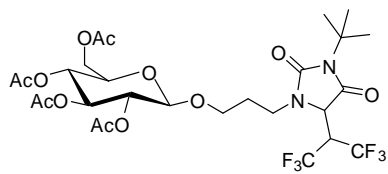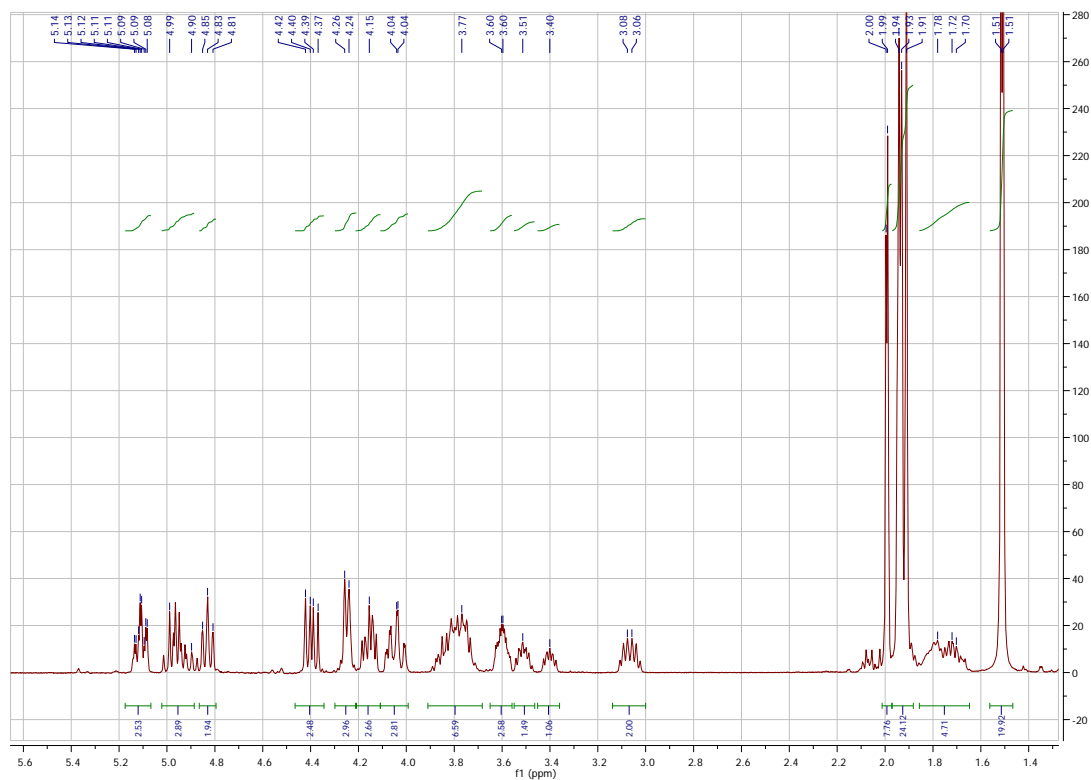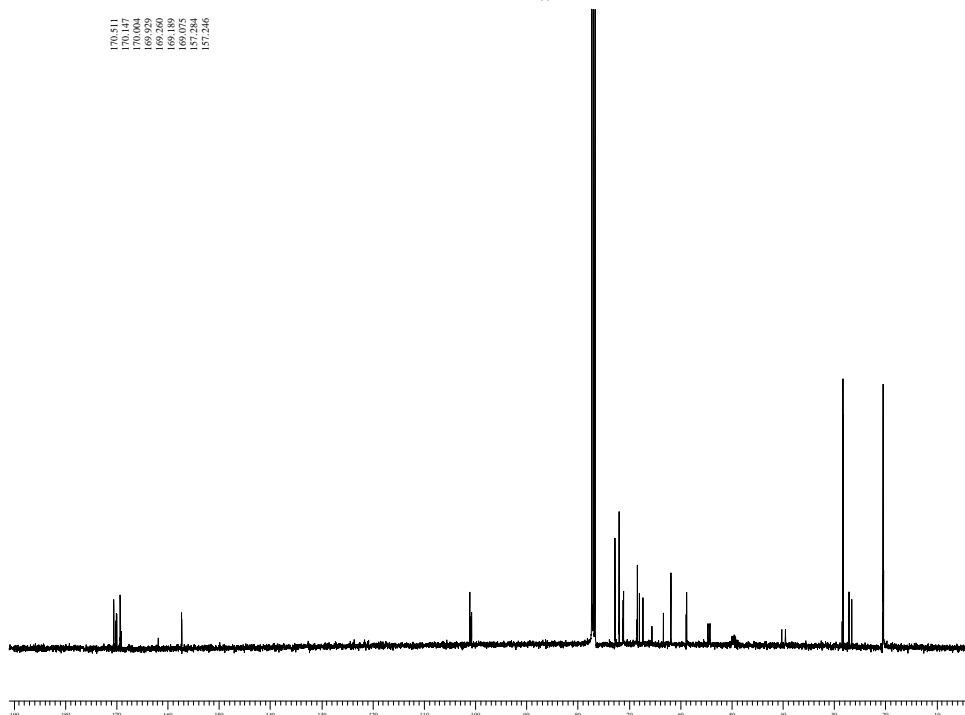

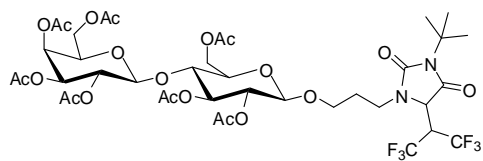

**6b**, mixture of two diastereoisomers

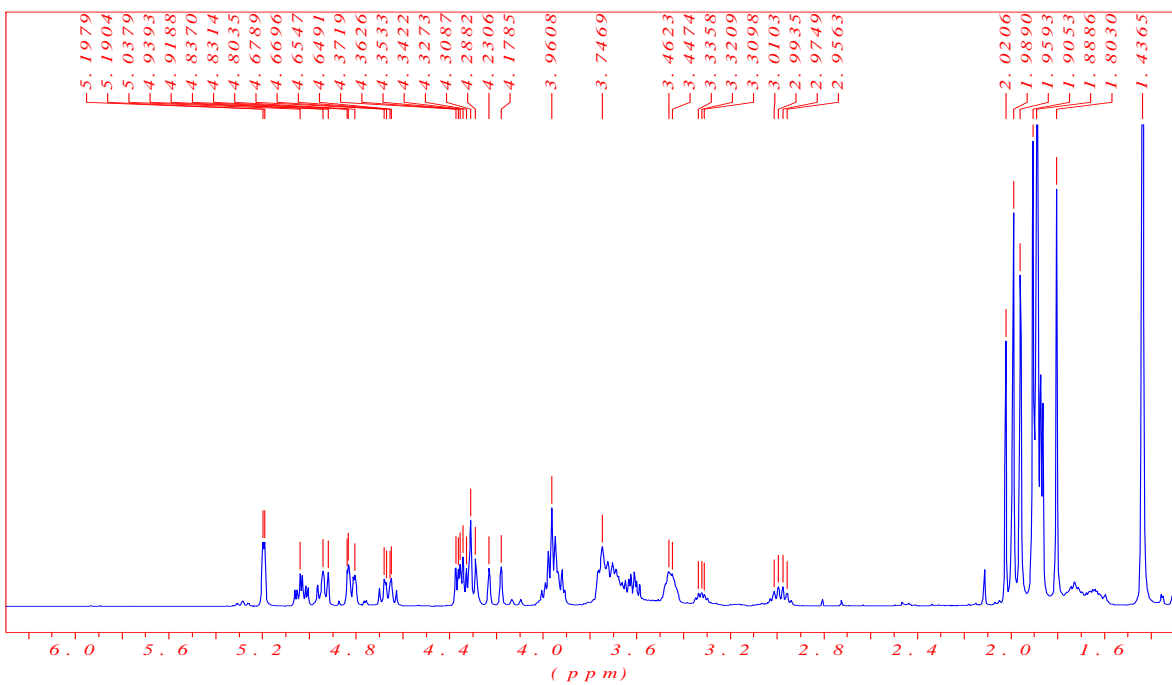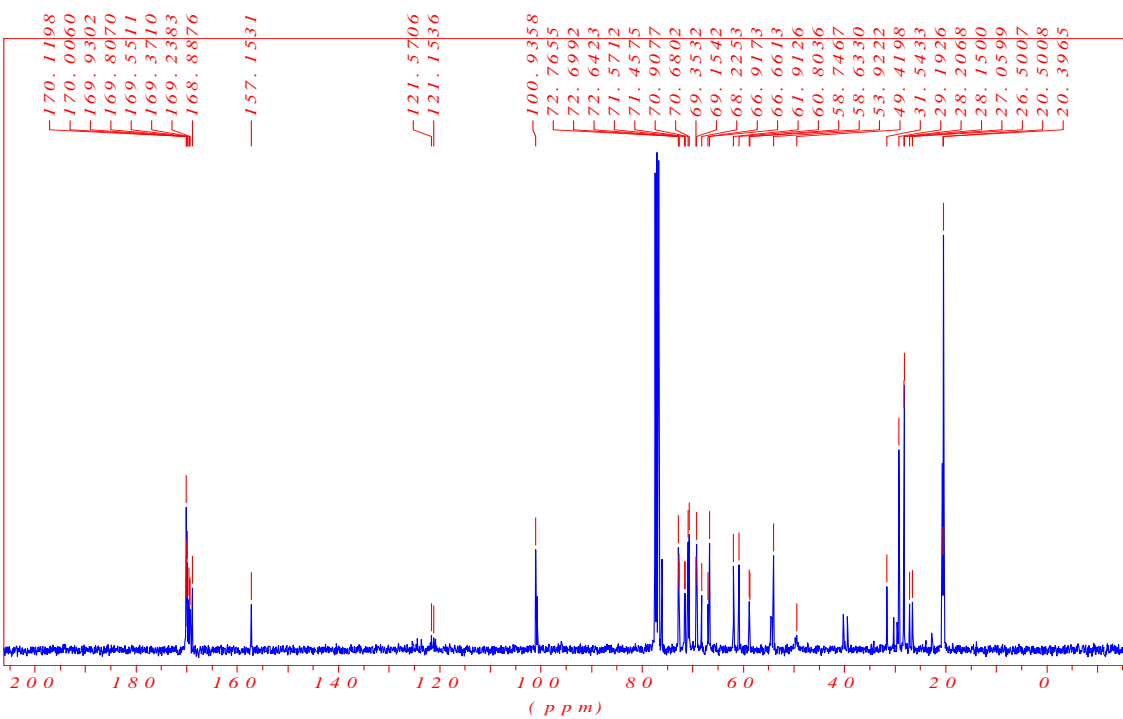

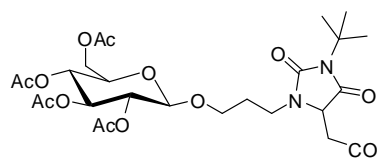

**6c**, mixture of two diastereoisomers

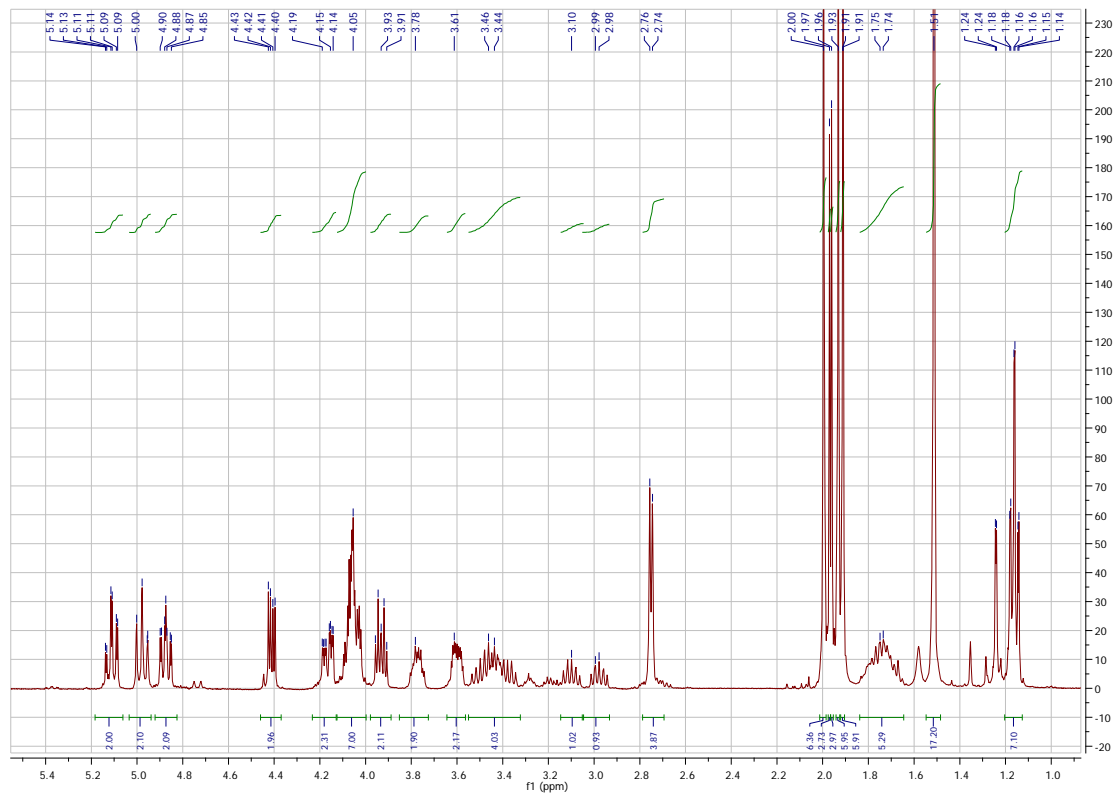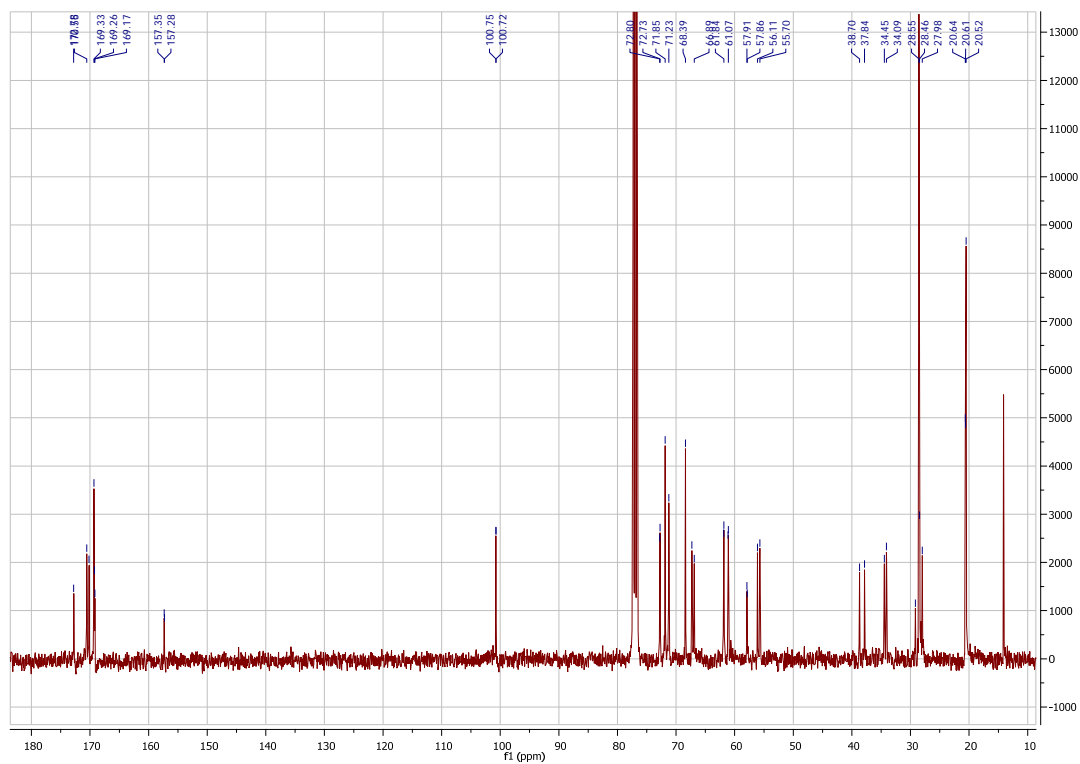

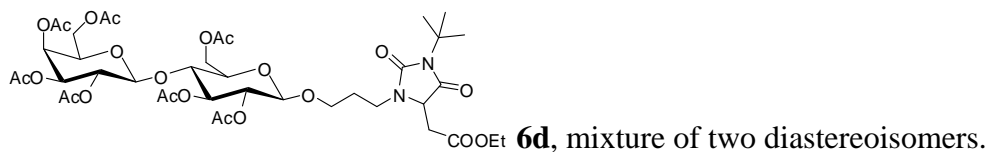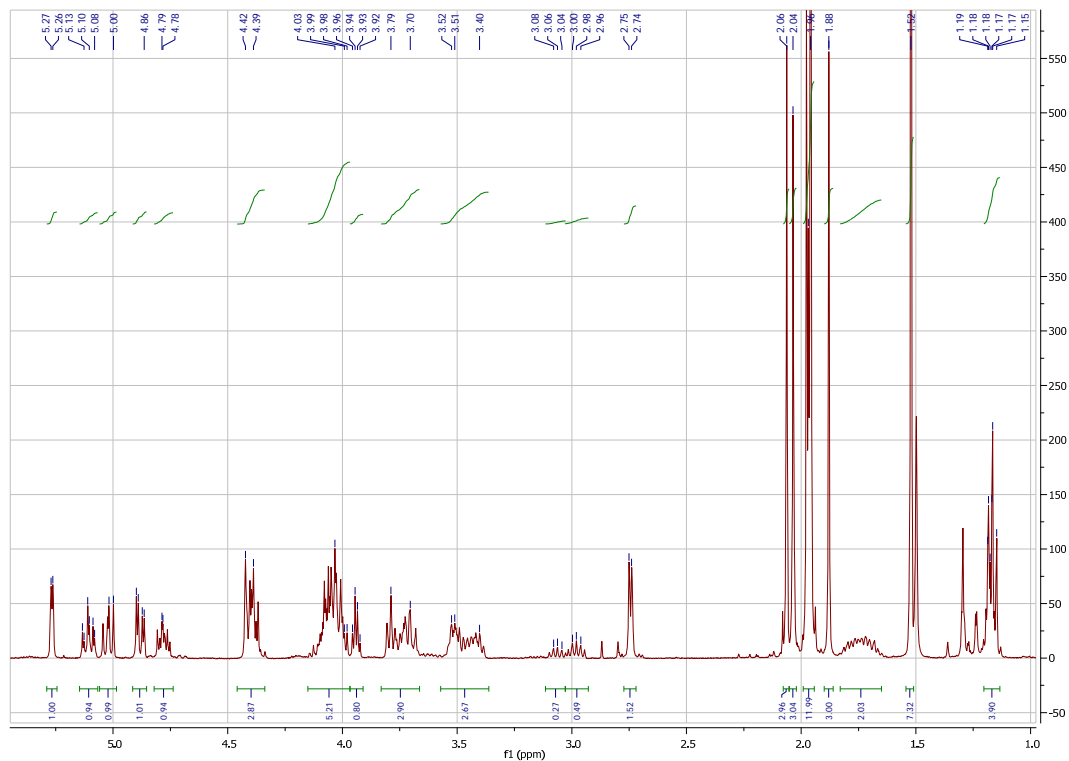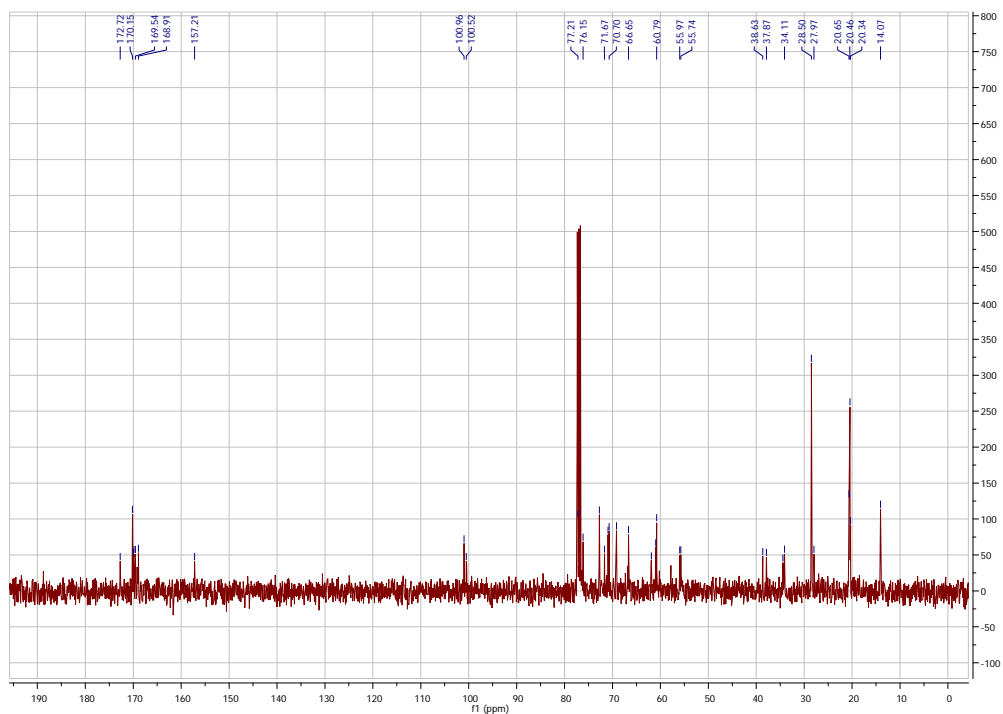

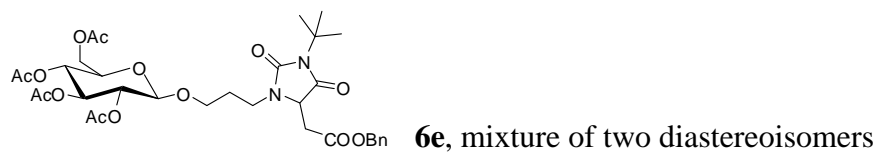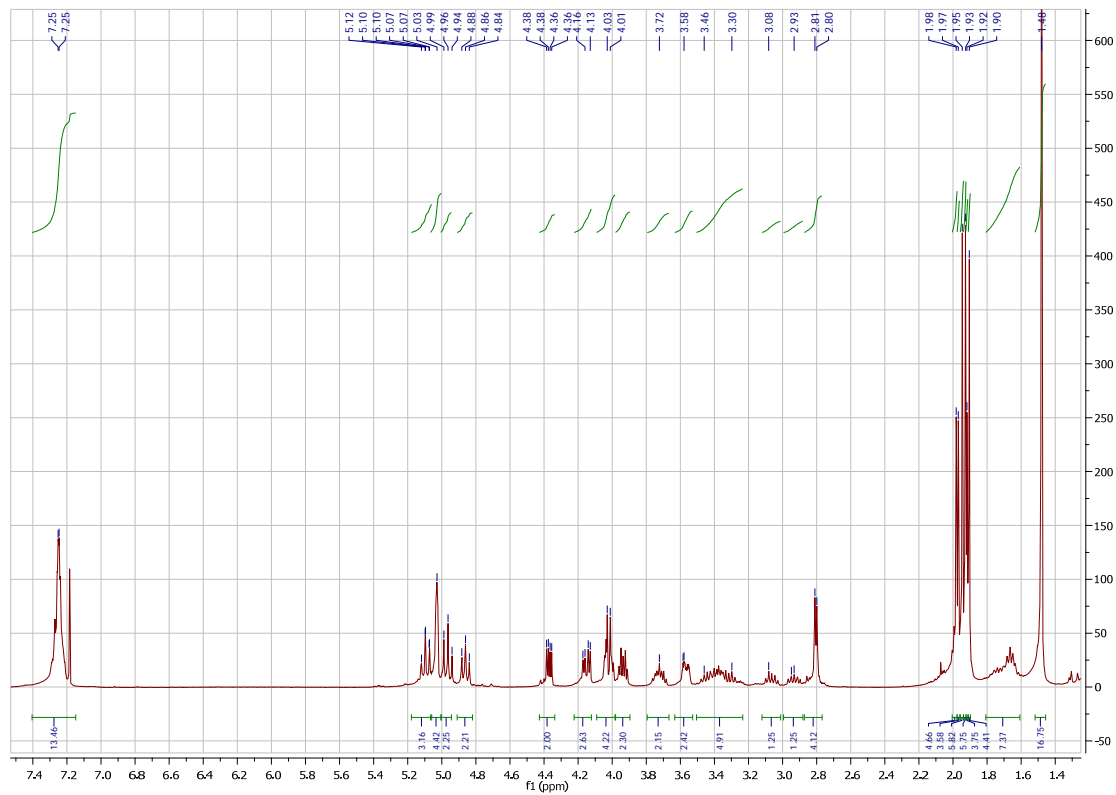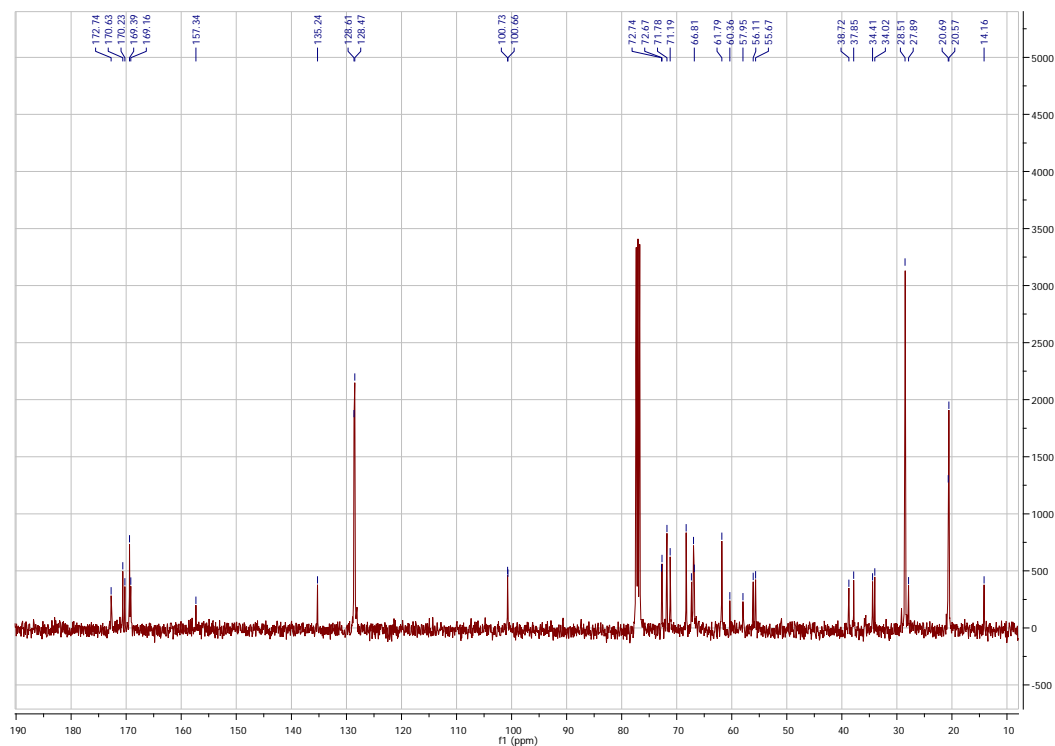

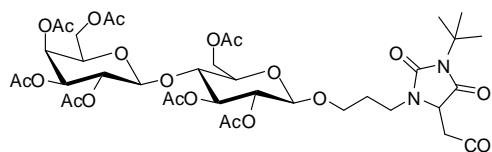

**6f**, mixture of two diastereoisomers

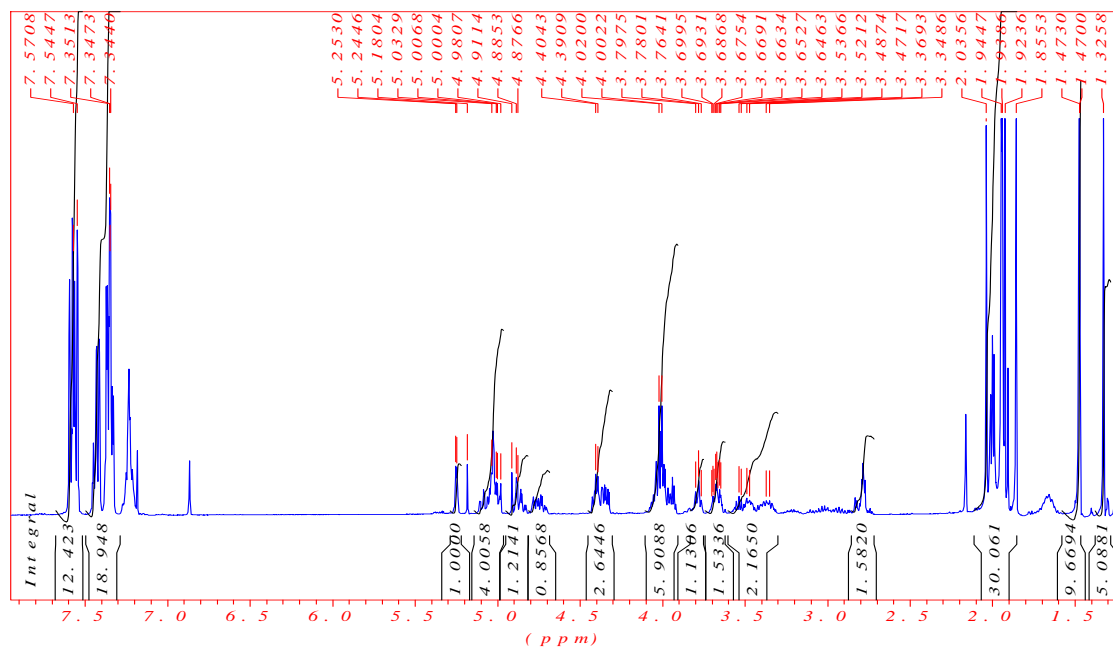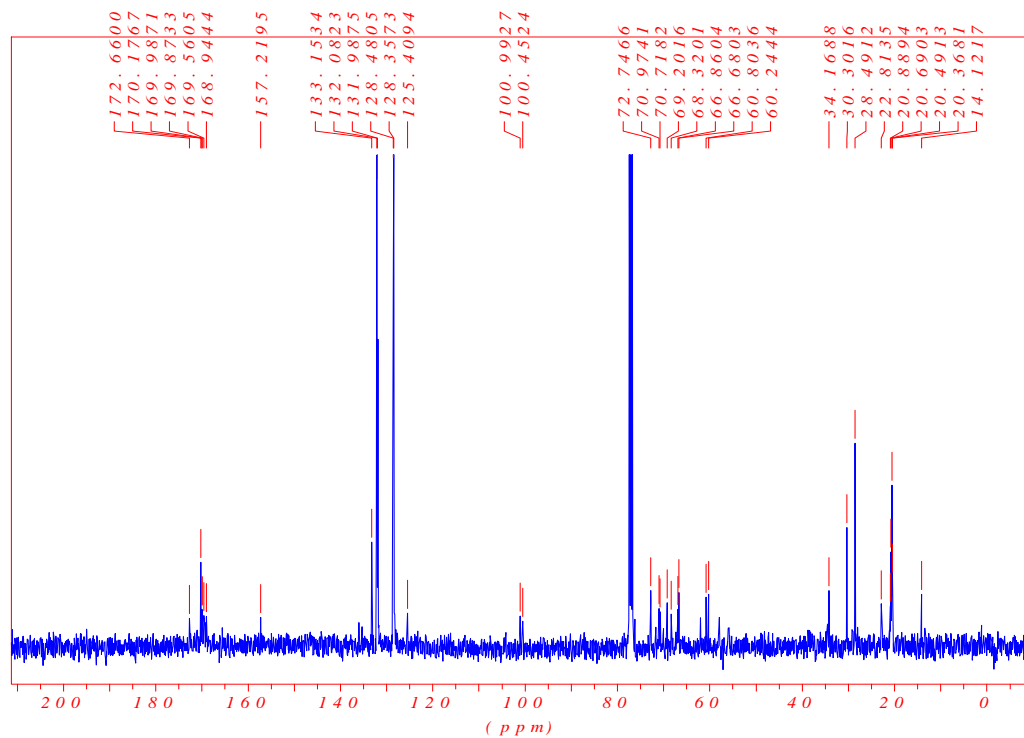

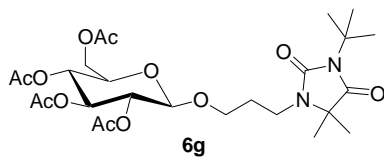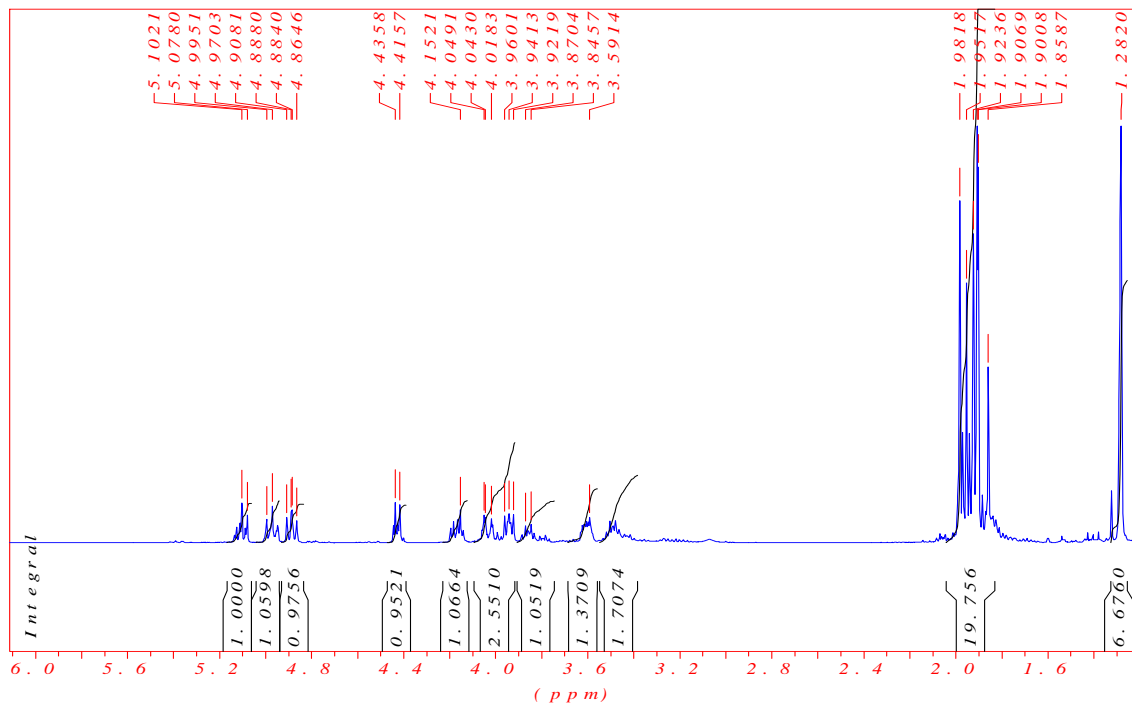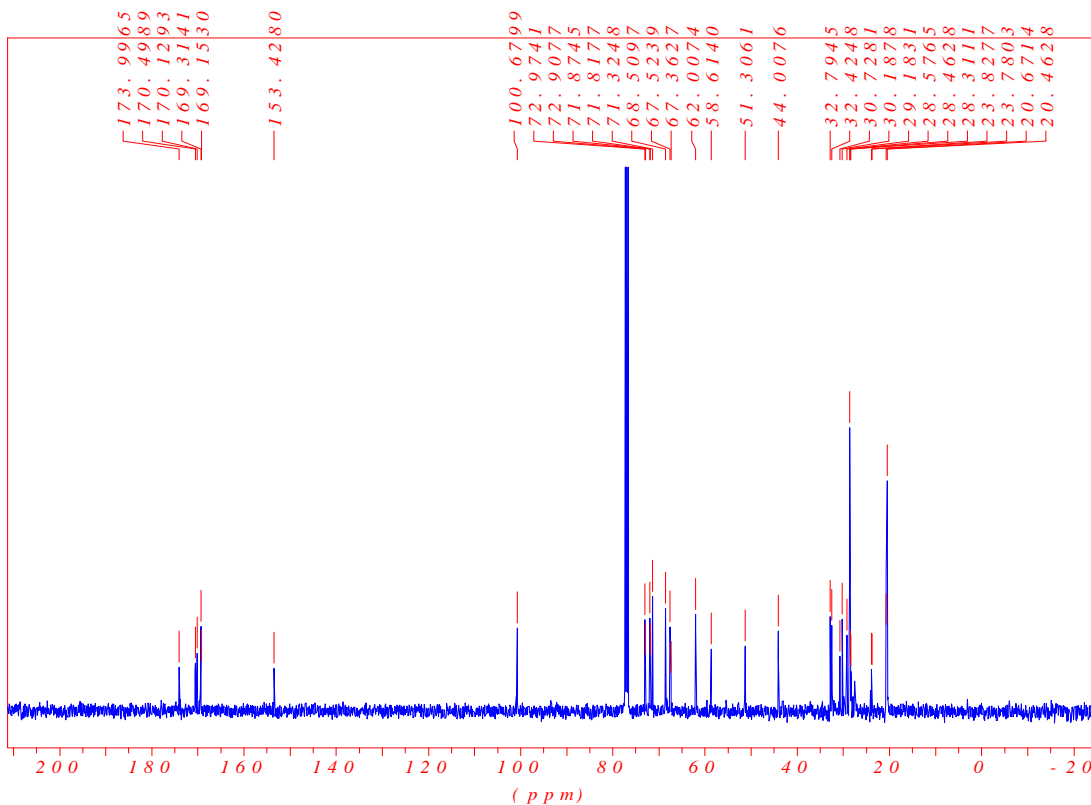



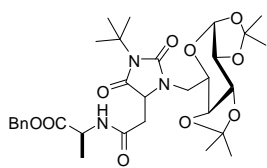

**11**, mixture of two diastereoisomers.

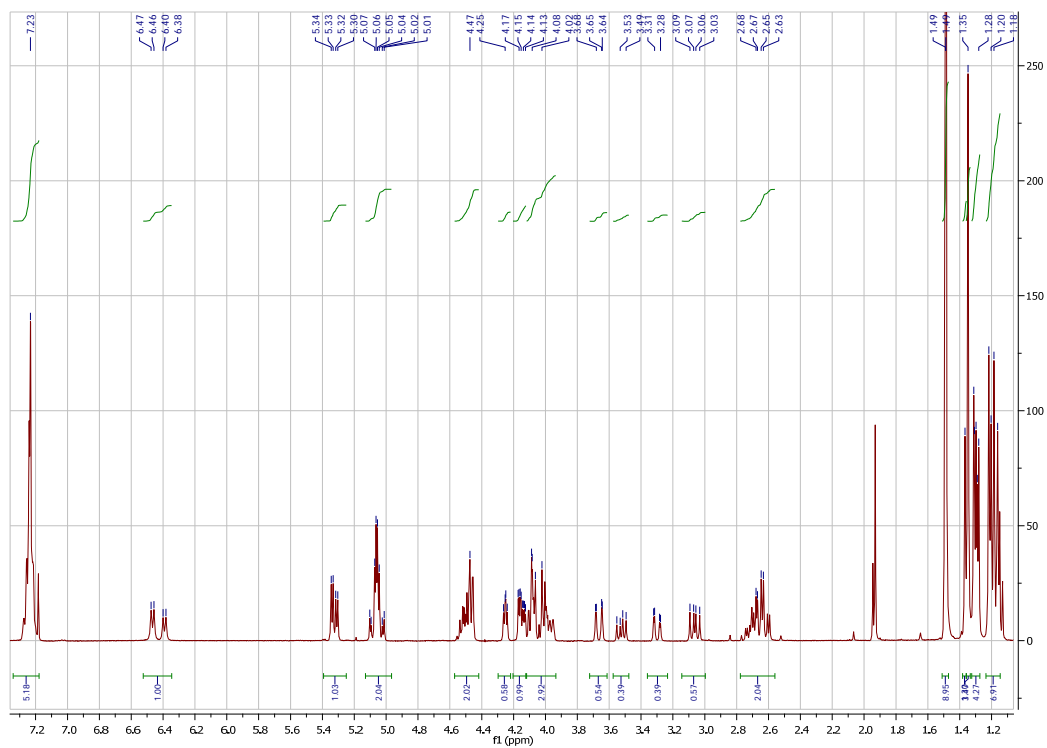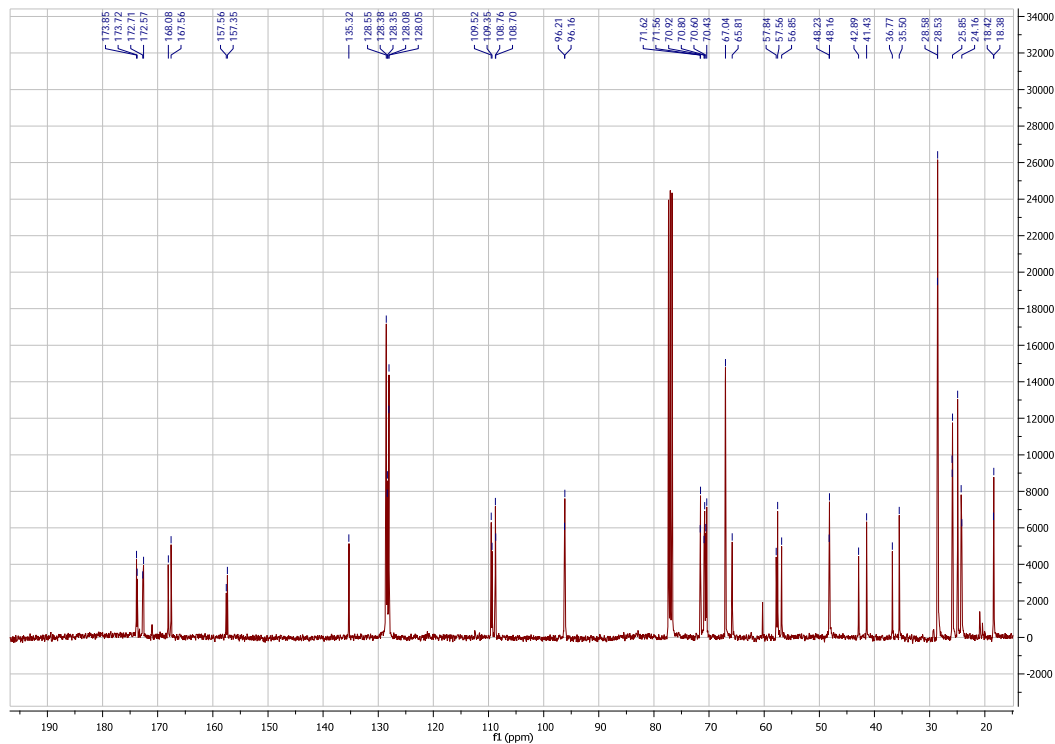

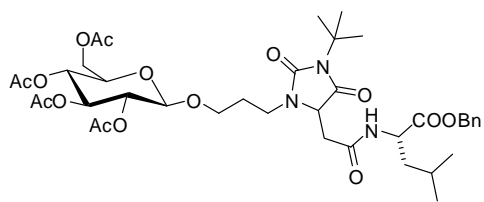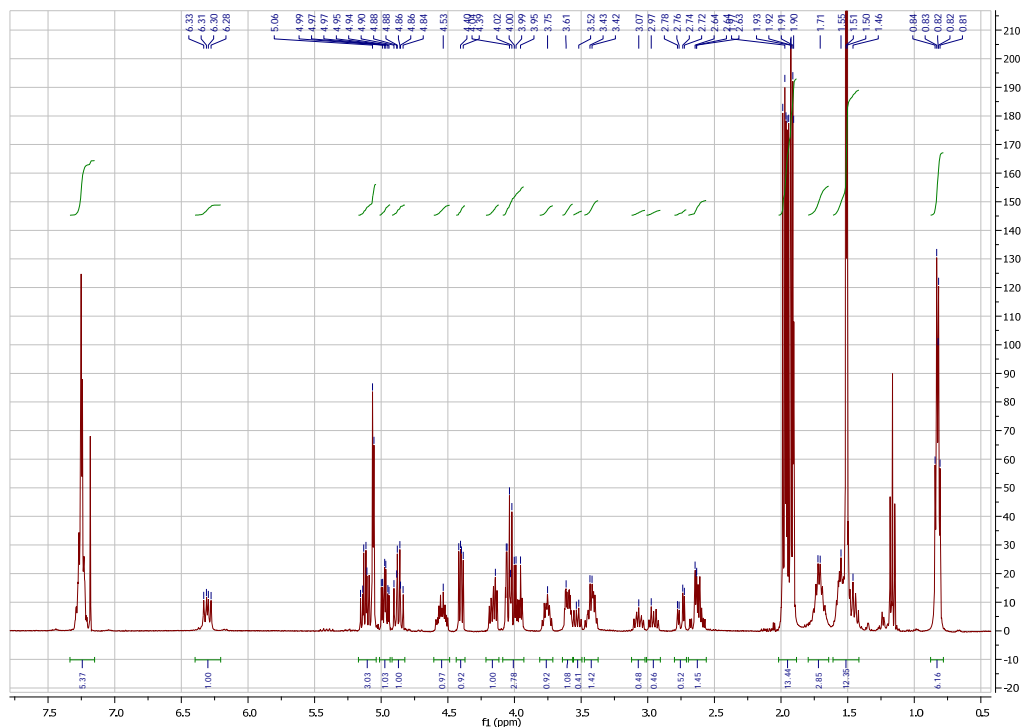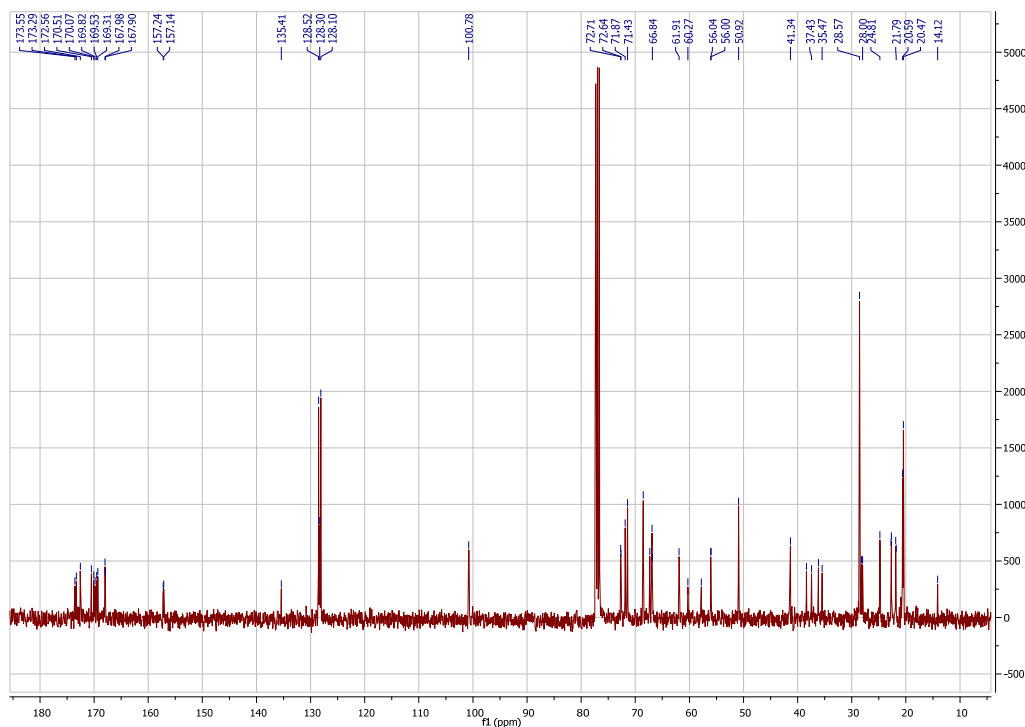

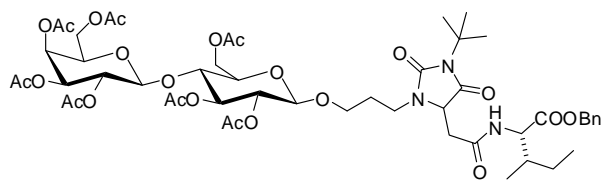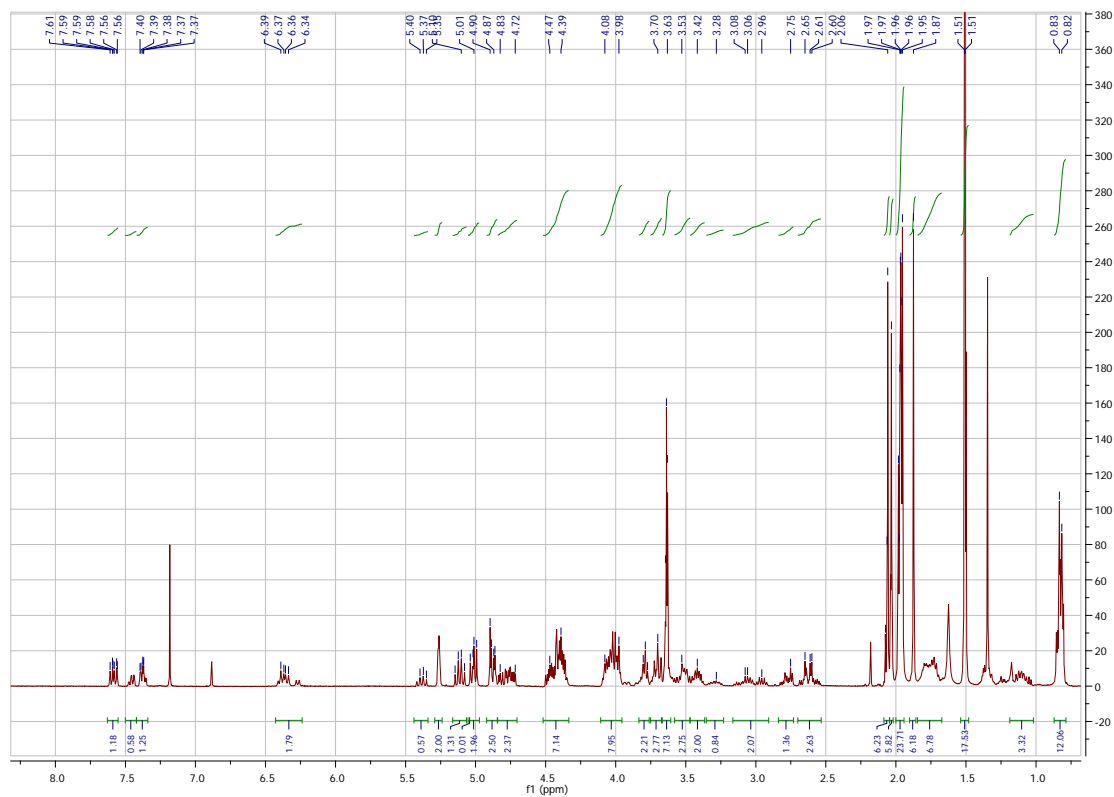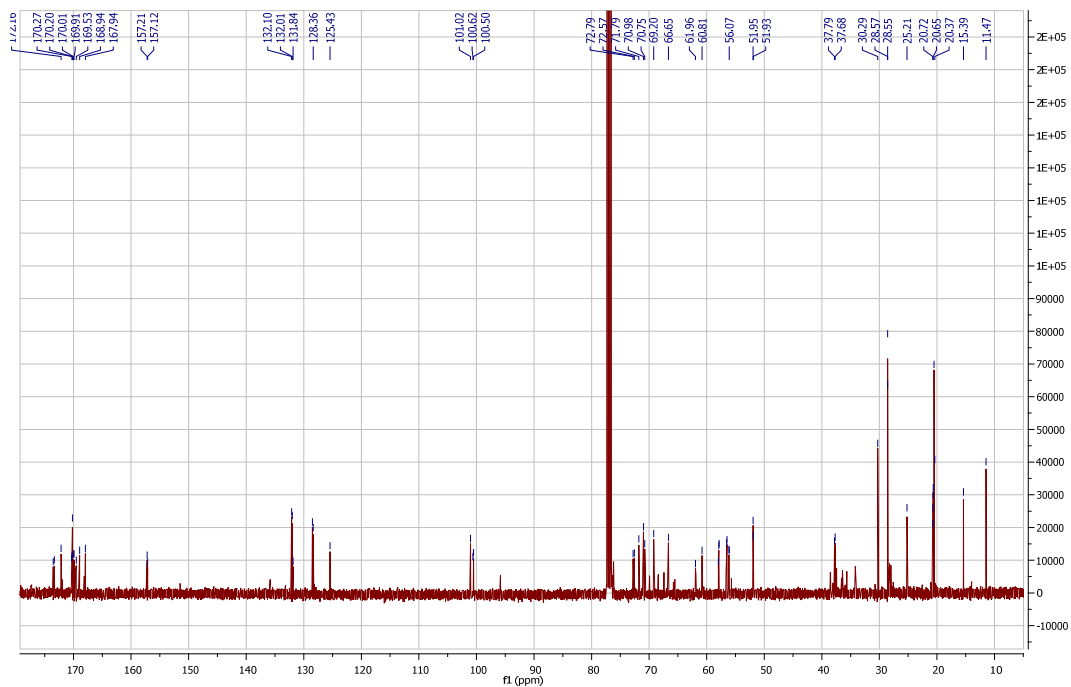

Supplement: c1ob06312j.pdf [file c1ob06312j.pdf]
